# Supplementary material for: Antifungal stilbene impregnation: transport and distribution on the micron-level
Source: PubMed Central journal article supplement (PMC6198867; doi:10.1093/treephys/tpy073), 2018-07-10

Raman intensity / Absorbance

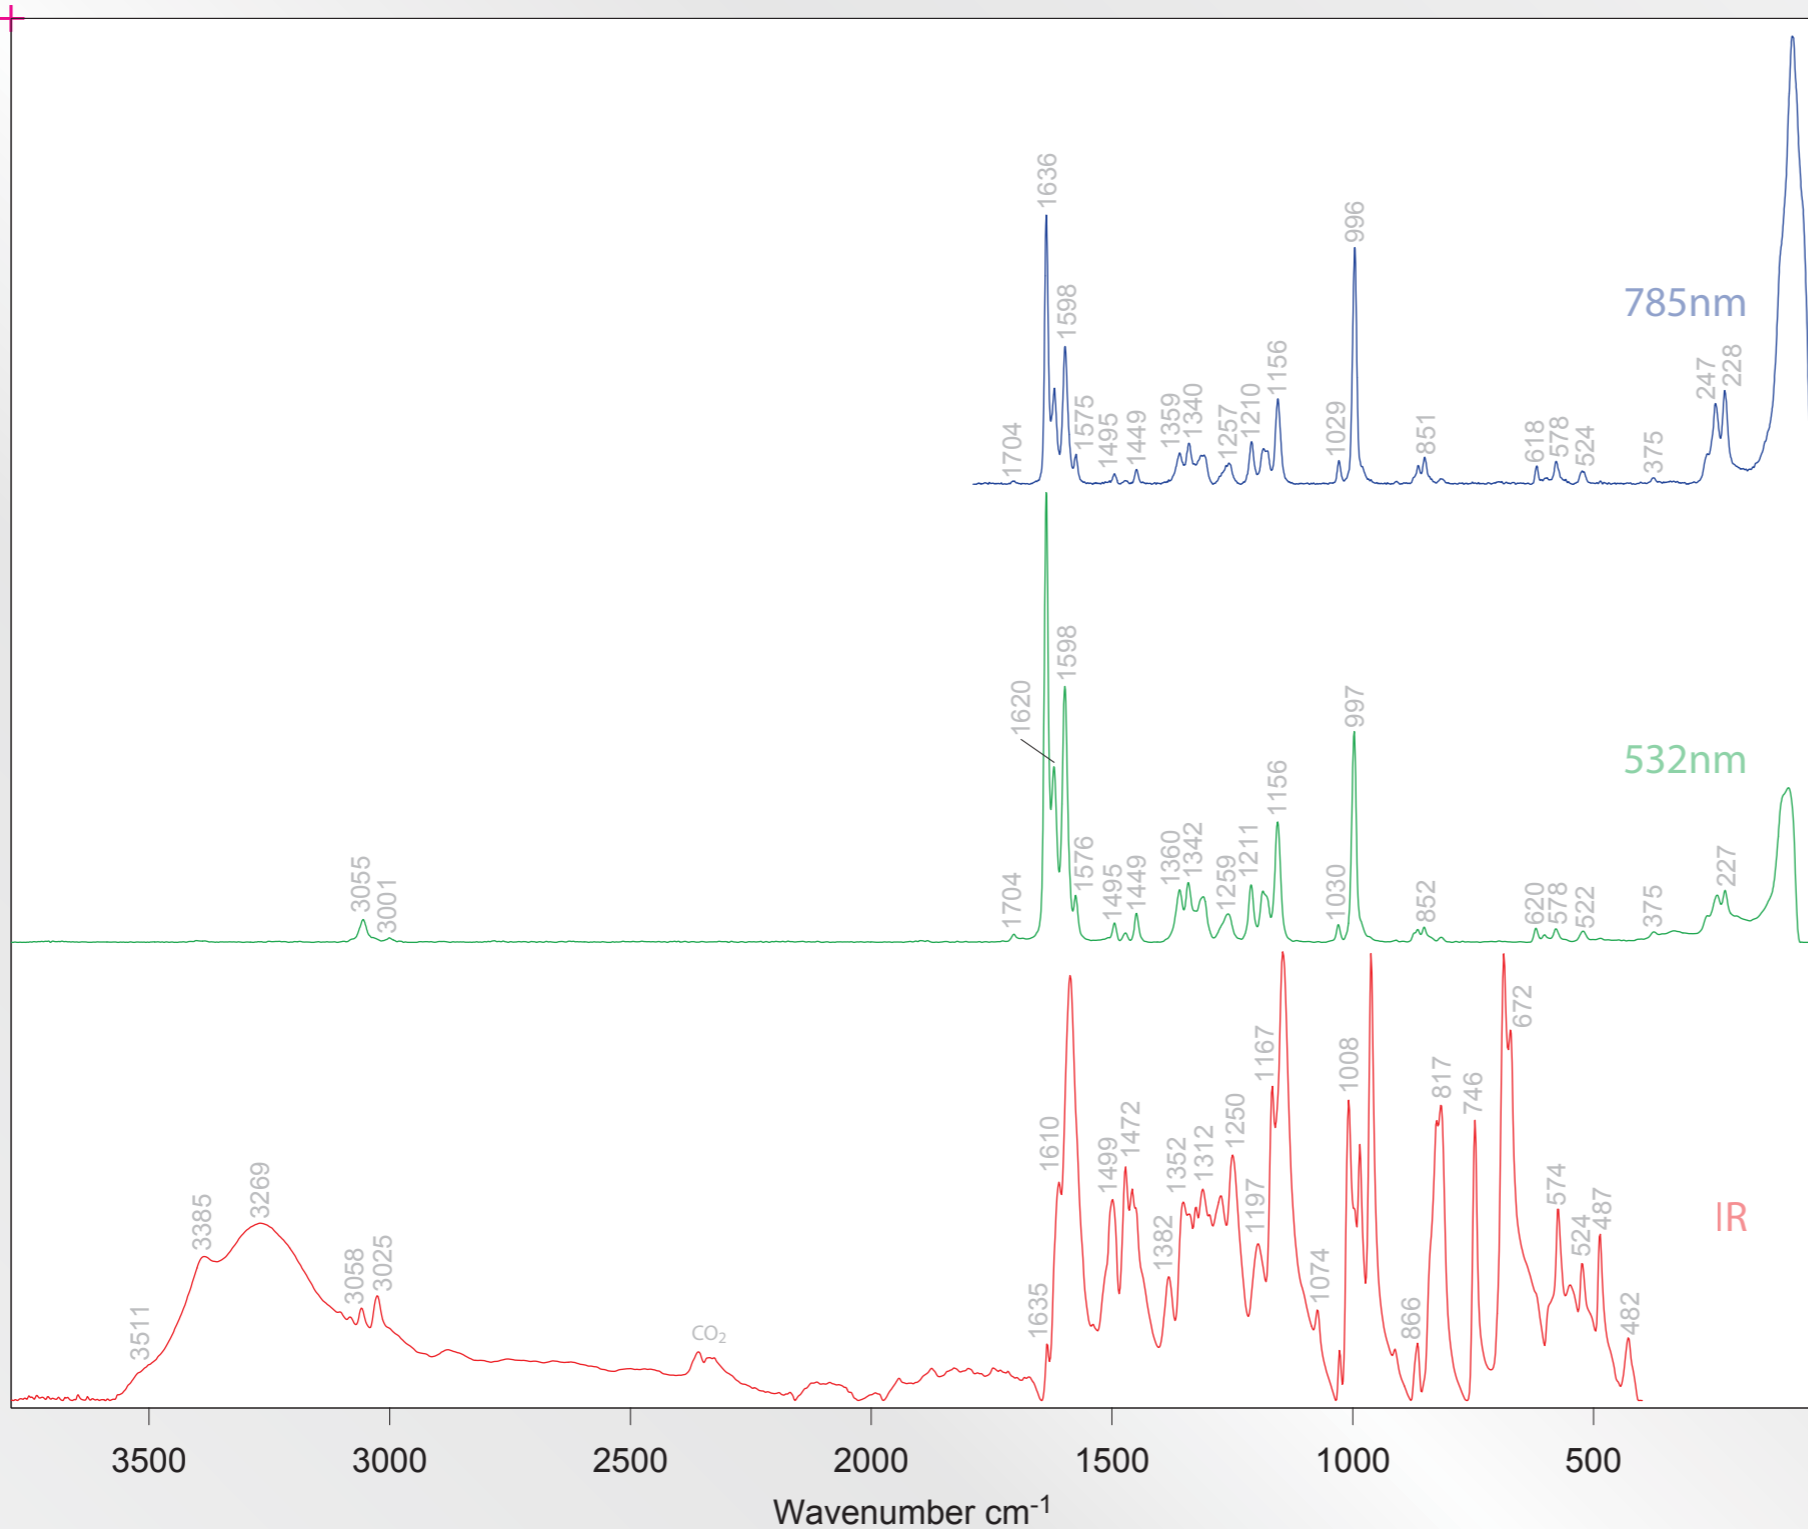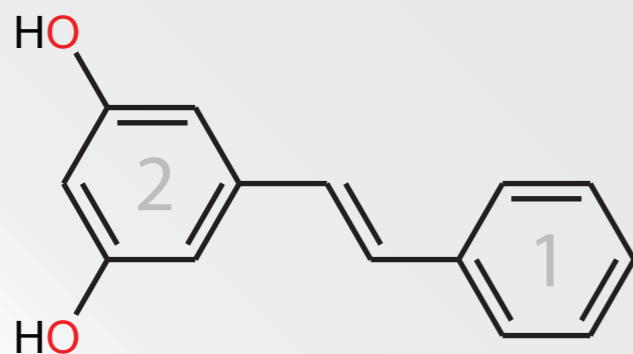

Sample: 56297  
Producer: Sigma  
Purity: 97%  
State: crystalline  
Temperature: n.d./21.3°C  
measured in: neat/H<sub>2</sub>O

Mode: Vertex ATR  
n<sub>Acc</sub>: 32

λ<sub>ex</sub>: 532.083 nm  
LPO: 15 mW  
v (Si): 520.03 cm<sup>-1</sup>  
t<sub>int</sub>: 10x0.14756 s  
Grating: 600 g/mm  
P<sub>Laser</sub>: 0°  
P<sub>Spectrometer</sub>: unpol  
Objective: 20x air NA 0.4

λ<sub>ex</sub>: 784.940 nm  
LPO: 81,4 mW  
v (Si): 520.07 cm<sup>-1</sup>  
t<sub>int</sub>: 0.04372 s  
Grating: 600 g/mm  
P<sub>Laser</sub>: 0°  
P<sub>Spectrometer</sub>: unpol  
Objective: 20x air NA 0.4

| IR   | 532  | 785  | R1  | R2  |                                                                              |
|------|------|------|-----|-----|------------------------------------------------------------------------------|
| 3511 |      |      |     |     | v O-H                                                                        |
| 3385 |      |      |     |     | v O-H                                                                        |
| 3269 |      |      |     |     | v O-H                                                                        |
| 3103 |      |      |     |     | v C-H of ring                                                                |
| 3082 |      |      | 2   |     | v C-H of R1                                                                  |
| 3058 | 3055 |      |     |     | v C-H of ring                                                                |
| 3025 |      |      |     |     | v C-H of ring/C=C                                                            |
| 2879 | 3001 |      |     |     | v C-H of ring/C=C                                                            |
| 1635 | 1704 | 1704 |     |     | v C=C                                                                        |
|      | 1636 | 1636 |     |     | v C=C of R2                                                                  |
|      | 1620 | 1620 | 8a  |     | v C=C of R2                                                                  |
| 1610 |      |      | 8a  |     | v C=C of R1                                                                  |
| 1587 | 1598 | 1598 | 8a  |     | v C=C of R2                                                                  |
|      | 1576 | 1575 | 8b  |     | v C=C of R1                                                                  |
| 1515 |      |      |     | 19a | v C=C of R2                                                                  |
| 1499 | 1495 | 1495 | 19a |     | v C=C of R1                                                                  |
| 1472 | 1472 | 1472 | 19b | 19b | v <sub>ip</sub> [C=C of ring]                                                |
| 1458 |      |      | 19b | 19b | v C=C of ring                                                                |
| 1451 | 1449 | 1449 | 19b | 19b | v <sub>op</sub> [C=C of ring]                                                |
| 1382 |      |      | 3   | 14  | δ C-H                                                                        |
| 1352 | 1360 | 1359 | 3   | 14  | v C=C of R2; δ C-H; δ O-H                                                    |
| 1340 | 1342 | 1340 | 3   | 13  | v <sub>ip</sub> [C <sub>sp</sub> -O, C <sub>sp</sub> -C]; δ C=C of R2; δ C-H |
| 1326 |      |      |     |     | δ C-H                                                                        |
| 1312 | 1311 | 1309 |     |     | δ C-H                                                                        |
| 1298 |      |      | 14  | 3   | δ C-H of ring R2                                                             |
| 1274 |      |      | 14  | 14  | δ C-H                                                                        |
| 1250 | 1259 | 1257 |     |     |                                                                              |
| 1197 | 1211 | 1210 | 13  | 13  | v C <sub>sp</sub> -C; δ C=C of ring R1                                       |
|      | 1187 | 1185 | 9a  | 18a | δ O-H, δ C-H of ring                                                         |
|      | 1178 | 1178 | 9a  | 18a | δ O-H, δ C-H of ring                                                         |
| 1167 |      |      |     | 7a  | v <sub>op</sub> [C <sub>sp</sub> -O, C <sub>sp</sub> -C]; δ C=C of R2        |
|      | 1156 | 1156 | 7a  | 7a  | v <sub>op</sub> [C <sub>sp</sub> -O, C <sub>sp</sub> -C]; δ C=C of R2        |
| 1145 |      |      |     | 7b  | v <sub>op</sub> [C <sub>sp</sub> -O]; δ C=C of R2; δ O-H                     |
| 1102 |      |      |     |     |                                                                              |
| 1074 |      |      |     | 18b | δ C-H of ring                                                                |
| 1027 | 1030 | 1029 | 18a |     | δ C-H of ring                                                                |
| 1008 |      |      |     |     |                                                                              |
| 997  | 997  | 996  | 12  | 12  | δ C=C of ring                                                                |
| 985  |      |      |     | 7b  | v <sub>op</sub> [C <sub>sp</sub> -O, C <sub>sp</sub> -C]; δ C=C of R2        |
| 962  |      |      |     |     | γ <sub>w</sub> C-H of C=C                                                    |
| 913  |      | 909  | 10b |     | γ <sub>t</sub> C-H of C=C; γ C-H of R1                                       |
| 866  | 865  | 864  | 1   |     | v C=C of R1                                                                  |
|      | 852  | 851  | 10a |     | γ C-H of R1                                                                  |
| 838  |      |      |     | 17a | γ C-H of R2                                                                  |
| 826  |      |      |     | 11  | γ C-H of R2                                                                  |
| 817  | 817  | 818  |     | 11  | γ C-H of R2                                                                  |
| 746  |      |      | 11  |     | γ C-H of R1                                                                  |
| 686  |      |      | 4   |     | γ C=C of R1                                                                  |
| 672  |      |      |     | 4   | γ C=C of R2                                                                  |
| 621  | 620  | 618  | 6b  |     | δ C=C of R1                                                                  |
|      | 602  | 597  | 6a  |     | δ C=C of R1                                                                  |
| 590  |      |      |     |     |                                                                              |
| 574  | 578  | 578  | 6a  | 1   | v/δ C=C of ring                                                              |
| 549  |      |      | 6a  | 6a  | δ C=C of ring                                                                |
| 524  | 522  | 524  | 6b  | 6b  | v/δ C=C of ring                                                              |
| 487  |      |      |     | 16b | γ C=C of R1                                                                  |
| 428  |      |      |     |     |                                                                              |
|      | 375  | 375  |     |     |                                                                              |
|      | 333  |      |     |     |                                                                              |
|      | 264  |      |     |     |                                                                              |
|      | 243  | 247  |     |     |                                                                              |
|      | 227  | 228  |     |     |                                                                              |
|      | 95   |      |     |     |                                                                              |

# Pinosylvinmonomethylether

Raman intensity / Absorbance

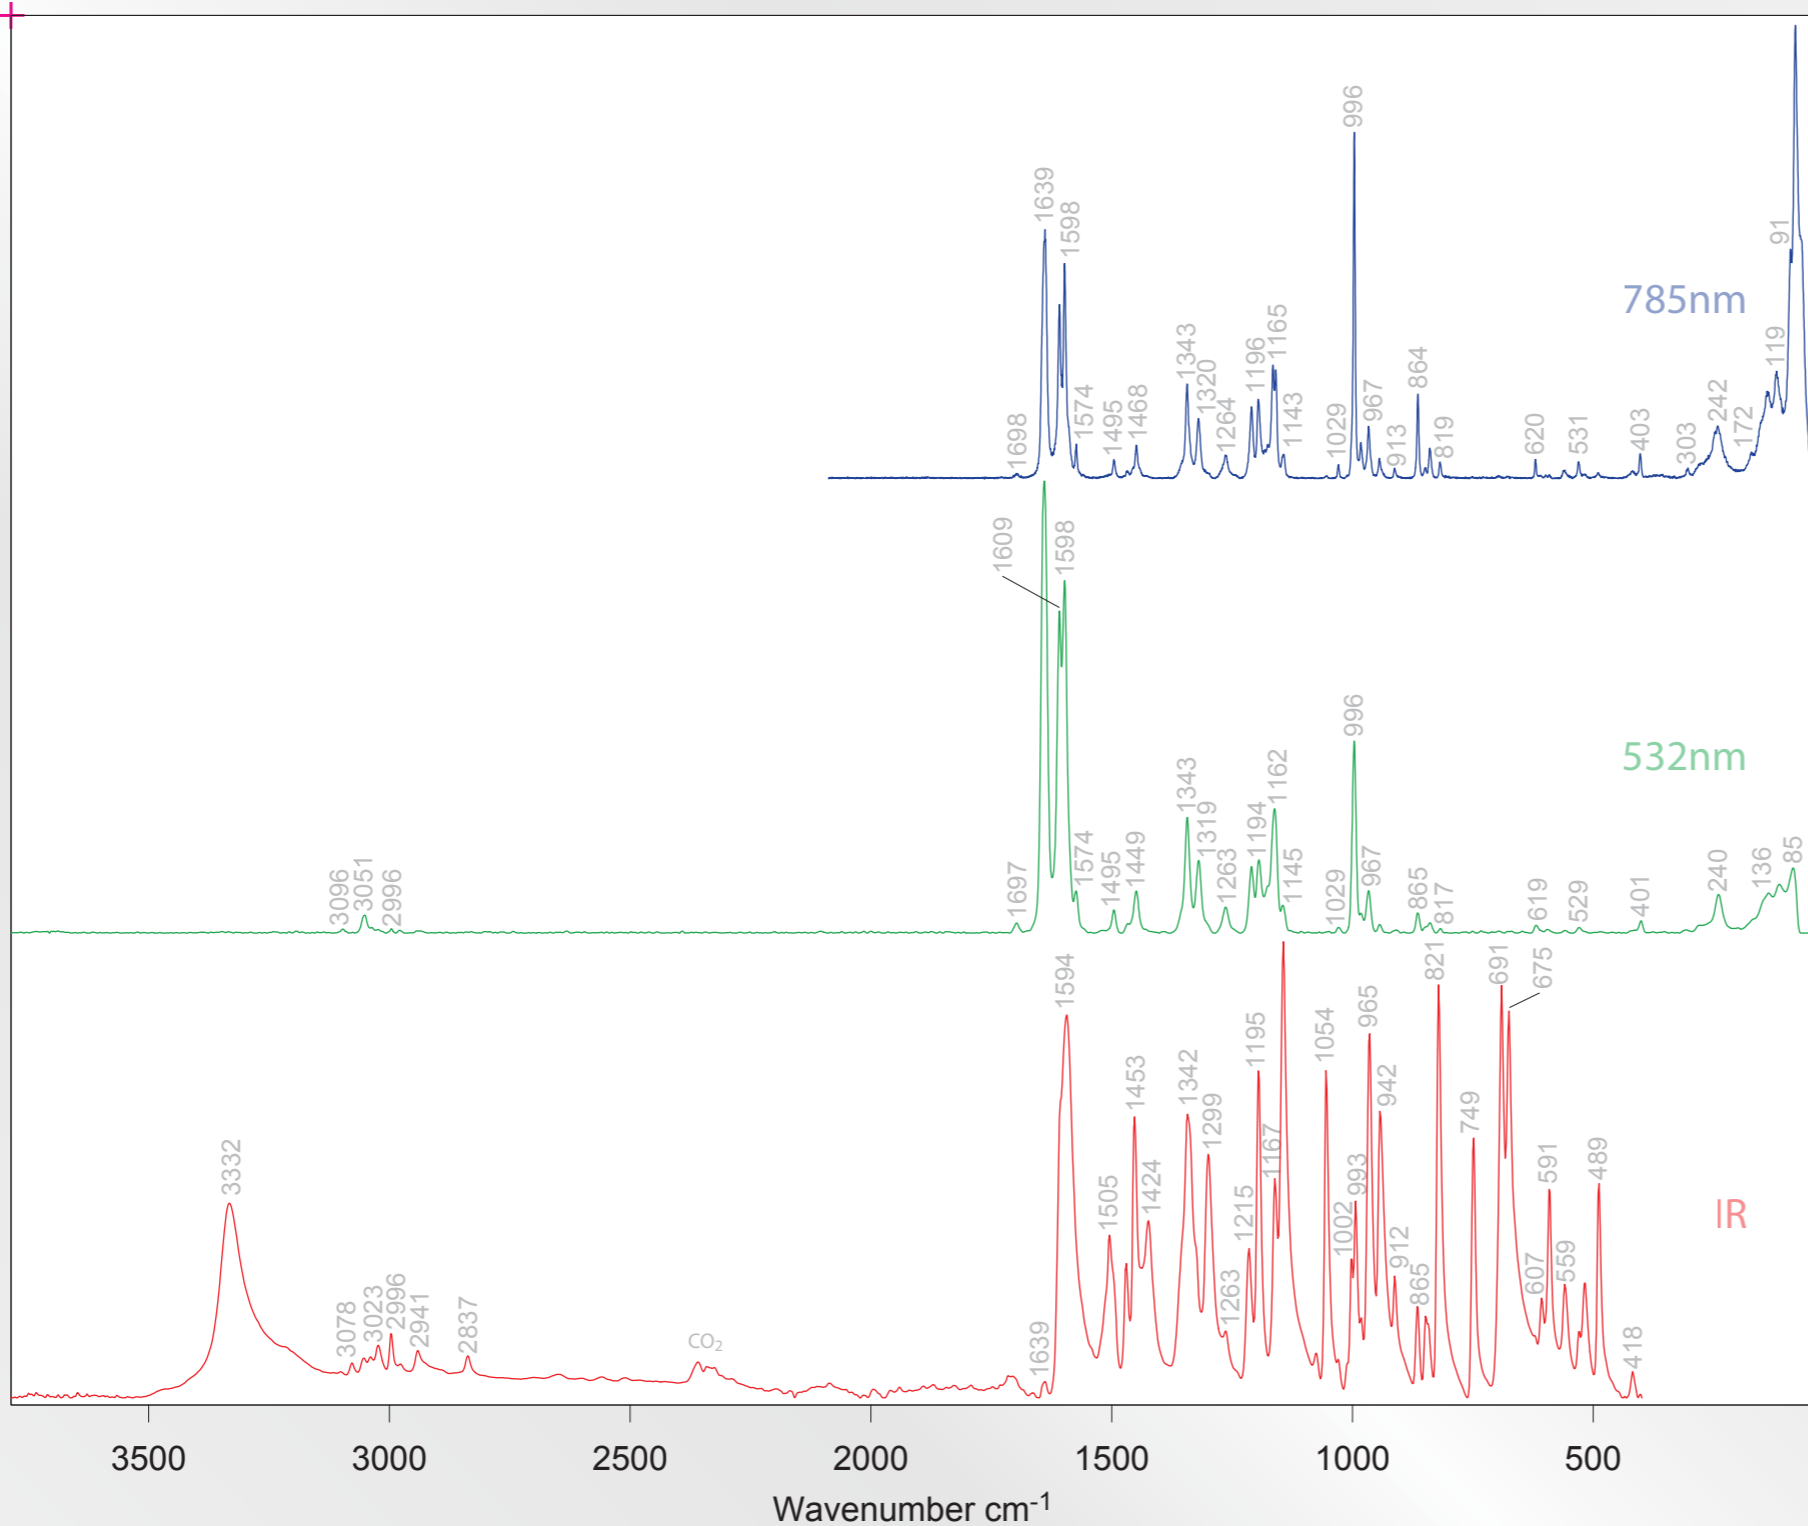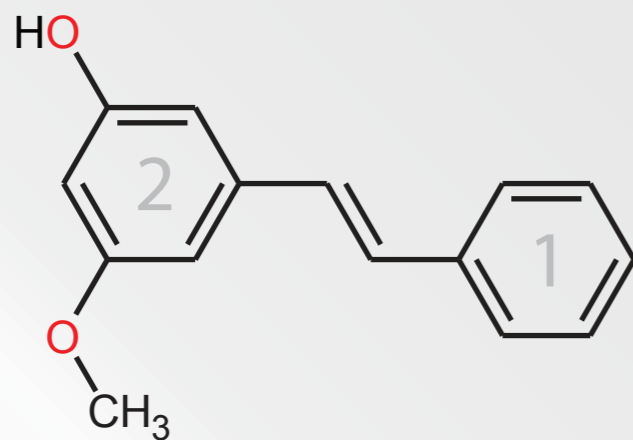

Sample: 42914  
Producer: Sigma  
Purity: 97%  
State: crystalline  
Temperature: 21.3°C  
measured in: -

Mode: Vertex ATR  
n<sub>Acc</sub>: 32

$\lambda_{ex}$ : 532.001 nm  
LPO: 10.1 mW  
 $\nu$  (Si): 518.62 cm<sup>-1</sup>  
 $t_{int}$ : 1.09765 s  
Grating: 600 g/mm  
P<sub>Laser</sub>: 0°  
P<sub>spectrometer</sub>: unpol  
Objective: 20x air NA 0.4

$\lambda_{ex}$ : 784.940 nm  
LPO: 79.10 mW  
 $\nu$  (Si): 520.07 cm<sup>-1</sup>  
 $t_{int}$ : 0.13372 s  
Grating: 1200 g/mm  
P<sub>Laser</sub>: 0°  
P<sub>spectrometer</sub>: unpol  
Objective: 20x air NA 0.4

| IR          | 532         | 785         | R1         | R2         |                                                                       |
|-------------|-------------|-------------|------------|------------|-----------------------------------------------------------------------|
| 3332        |             |             |            |            | v O-H                                                                 |
|             | 3096        |             |            |            | v C-H of ring                                                         |
| 3078        |             |             |            |            | v C-H of R1                                                           |
| 3053        | 3051        |             |            |            | v C-H of ring                                                         |
| 3039        | 3035        |             |            |            | v C-H of ring                                                         |
| 3023        | 3023        |             |            |            | v C-H of C=C                                                          |
| 2996        | 2996        |             |            |            | $\nu_{as}$ C-H of CH <sub>3</sub>                                     |
|             | 2979        |             |            |            | $\nu_{as}$ C-H of CH <sub>3</sub>                                     |
| 2941        | 2943        |             |            |            | $\nu_{as}$ C-H of CH <sub>3</sub>                                     |
| 2837        |             |             |            |            | $\nu_s$ C-H of CH <sub>3</sub>                                        |
| 1710        | 1697        | 1698        |            |            | v C=C                                                                 |
| 1639        | <b>1640</b> | <b>1639</b> |            |            | v C=C of R2                                                           |
| <b>1606</b> | <b>1609</b> | <b>1608</b> |            | <b>8a</b>  | v C=C of R1                                                           |
| <b>1594</b> | <b>1598</b> | <b>1598</b> | <b>8a</b>  | <b>8b</b>  | v C=C of R1                                                           |
|             | 1574        | 1574        |            |            | v C=C of R1                                                           |
| 1505        | 1495        | 1495        | <b>19a</b> | <b>19a</b> | v C=C of ring                                                         |
| 1470        |             | 1468        |            |            | $\delta_{as}$ C-H of CH <sub>3</sub>                                  |
| 1453        | 1449        | 1449        | <b>19b</b> |            | v C=C of R1                                                           |
| 1424        |             |             | <b>19b</b> | <b>19b</b> | v C=C of R2                                                           |
| 1342        | 1343        | 1343        | <b>3</b>   | <b>14</b>  | $\delta$ C-H of R1 and C=C                                            |
|             | 1319        | 1320        |            | <b>13</b>  | $\nu_{ip}$ [C <sub>0</sub> -O, C <sub>0</sub> -C]; $\delta$ C=C of R2 |
| 1299        |             |             | <b>14</b>  | <b>3</b>   | $\delta$ C-H of R2 and C=C; v C=C of R1                               |
| 1263        | 1263        | 1264        | <b>14</b>  | <b>3</b>   | $\delta$ C-H of R2 and C=C; v C=C of R1                               |
| 1215        | 1210        | 1210        | <b>13</b>  |            | v C <sub>0</sub> -C; $\delta$ C=C of R1                               |
| 1195        | 1194        | 1196        |            |            | $\gamma_r$ C-H of CH <sub>3</sub> ; $\delta$ O-H; v C <sub>0</sub> -O |
|             | 1179        |             | <b>9a</b>  |            | $\delta$ C-H of R1                                                    |
| 1161        | 1162        | 1165        |            | <b>7a</b>  | $\nu_{op}$ [C <sub>0</sub> -O, C <sub>0</sub> -C]; $\delta$ C=C of R2 |
|             | 1159        |             | <b>7a</b>  |            | $\nu_{op}$ [C <sub>0</sub> -O, C <sub>0</sub> -C]; $\delta$ C=C of R2 |
| <b>1144</b> | 1145        | 1143        |            | <b>7b</b>  | $\nu_{op}$ [C <sub>0</sub> -O, C <sub>0</sub> -C]; $\delta$ C=C of R2 |
| 1075        |             |             | <b>18b</b> |            | $\delta$ C-H of R1                                                    |
| 1054        |             | 1053        | <b>18b</b> | <b>18b</b> | v O-CH <sub>3</sub>                                                   |
| 1030        | 1029        | 1029        | <b>18a</b> |            | $\delta$ C-H of R1                                                    |
| 1002        | <b>996</b>  | <b>996</b>  | <b>12</b>  |            | $\delta$ C=C of R1                                                    |
| 993         | <b>996</b>  | <b>996</b>  |            | <b>12</b>  | $\delta$ C=C of R2                                                    |
| 982         |             | 983         |            | <b>5</b>   | $\gamma$ C-H of R1                                                    |
| 965         | 967         | 967         |            |            | $\gamma_w$ C-H of C=C                                                 |
| 942         | 944         | 944         |            |            | $\nu_s$ C-O-C                                                         |
| 912         | 909         | 913         | <b>10b</b> |            | $\gamma_t$ C-H of C=C; $\gamma$ C-H of R1                             |
| 865         | 865         | 864         | <b>1</b>   |            | v C=C of R1                                                           |
| 848         |             | 849         | <b>10b</b> | <b>17b</b> | $\gamma_t$ C-H of C=C; $\gamma$ C-H of ring                           |
| 843         | 839         | 840         | <b>10a</b> |            | $\gamma$ C-H of R1                                                    |
| <b>821</b>  | 817         | 819         |            | <b>11</b>  | $\gamma$ C-H of R2                                                    |
| 749         |             |             | <b>11</b>  |            | $\gamma$ C-H of R1                                                    |
| <b>691</b>  |             | 697         | <b>4</b>   |            | $\gamma$ C=C of R1                                                    |
| <b>675</b>  |             |             | <b>4</b>   |            | $\gamma$ C=C of R2                                                    |
|             | 619         | 620         | <b>6b</b>  |            | $\delta$ C=C of R1                                                    |
| 607         |             |             |            |            |                                                                       |
| 591         |             | 591         | <b>6a</b>  | <b>1</b>   |                                                                       |
| 559         |             | 559         | <b>6a</b>  | <b>1</b>   |                                                                       |
| 529         | 529         | 531         | <b>6b</b>  | <b>6a</b>  | $\delta$ C=C of R2                                                    |
| 518         |             |             | <b>6a</b>  | <b>6a</b>  | $\delta$ C=C of R2                                                    |
| 489         |             | 491         | <b>16b</b> |            | $\gamma$ C=C of R1                                                    |
| 418         |             | 418         |            |            | $\delta$ C-O-C                                                        |
|             | 401         | 403         | <b>16a</b> |            | $\gamma$ C=C of R1                                                    |
|             |             | 303         |            |            |                                                                       |
|             | 240         | 242         |            |            |                                                                       |
|             |             | 172         |            |            |                                                                       |
|             | 136         | 139         |            |            |                                                                       |
|             | 114         | 119         |            |            |                                                                       |
|             |             | 91          |            |            |                                                                       |
|             | 85          | 81          |            |            |                                                                       |

Raman intensity / Absorbance

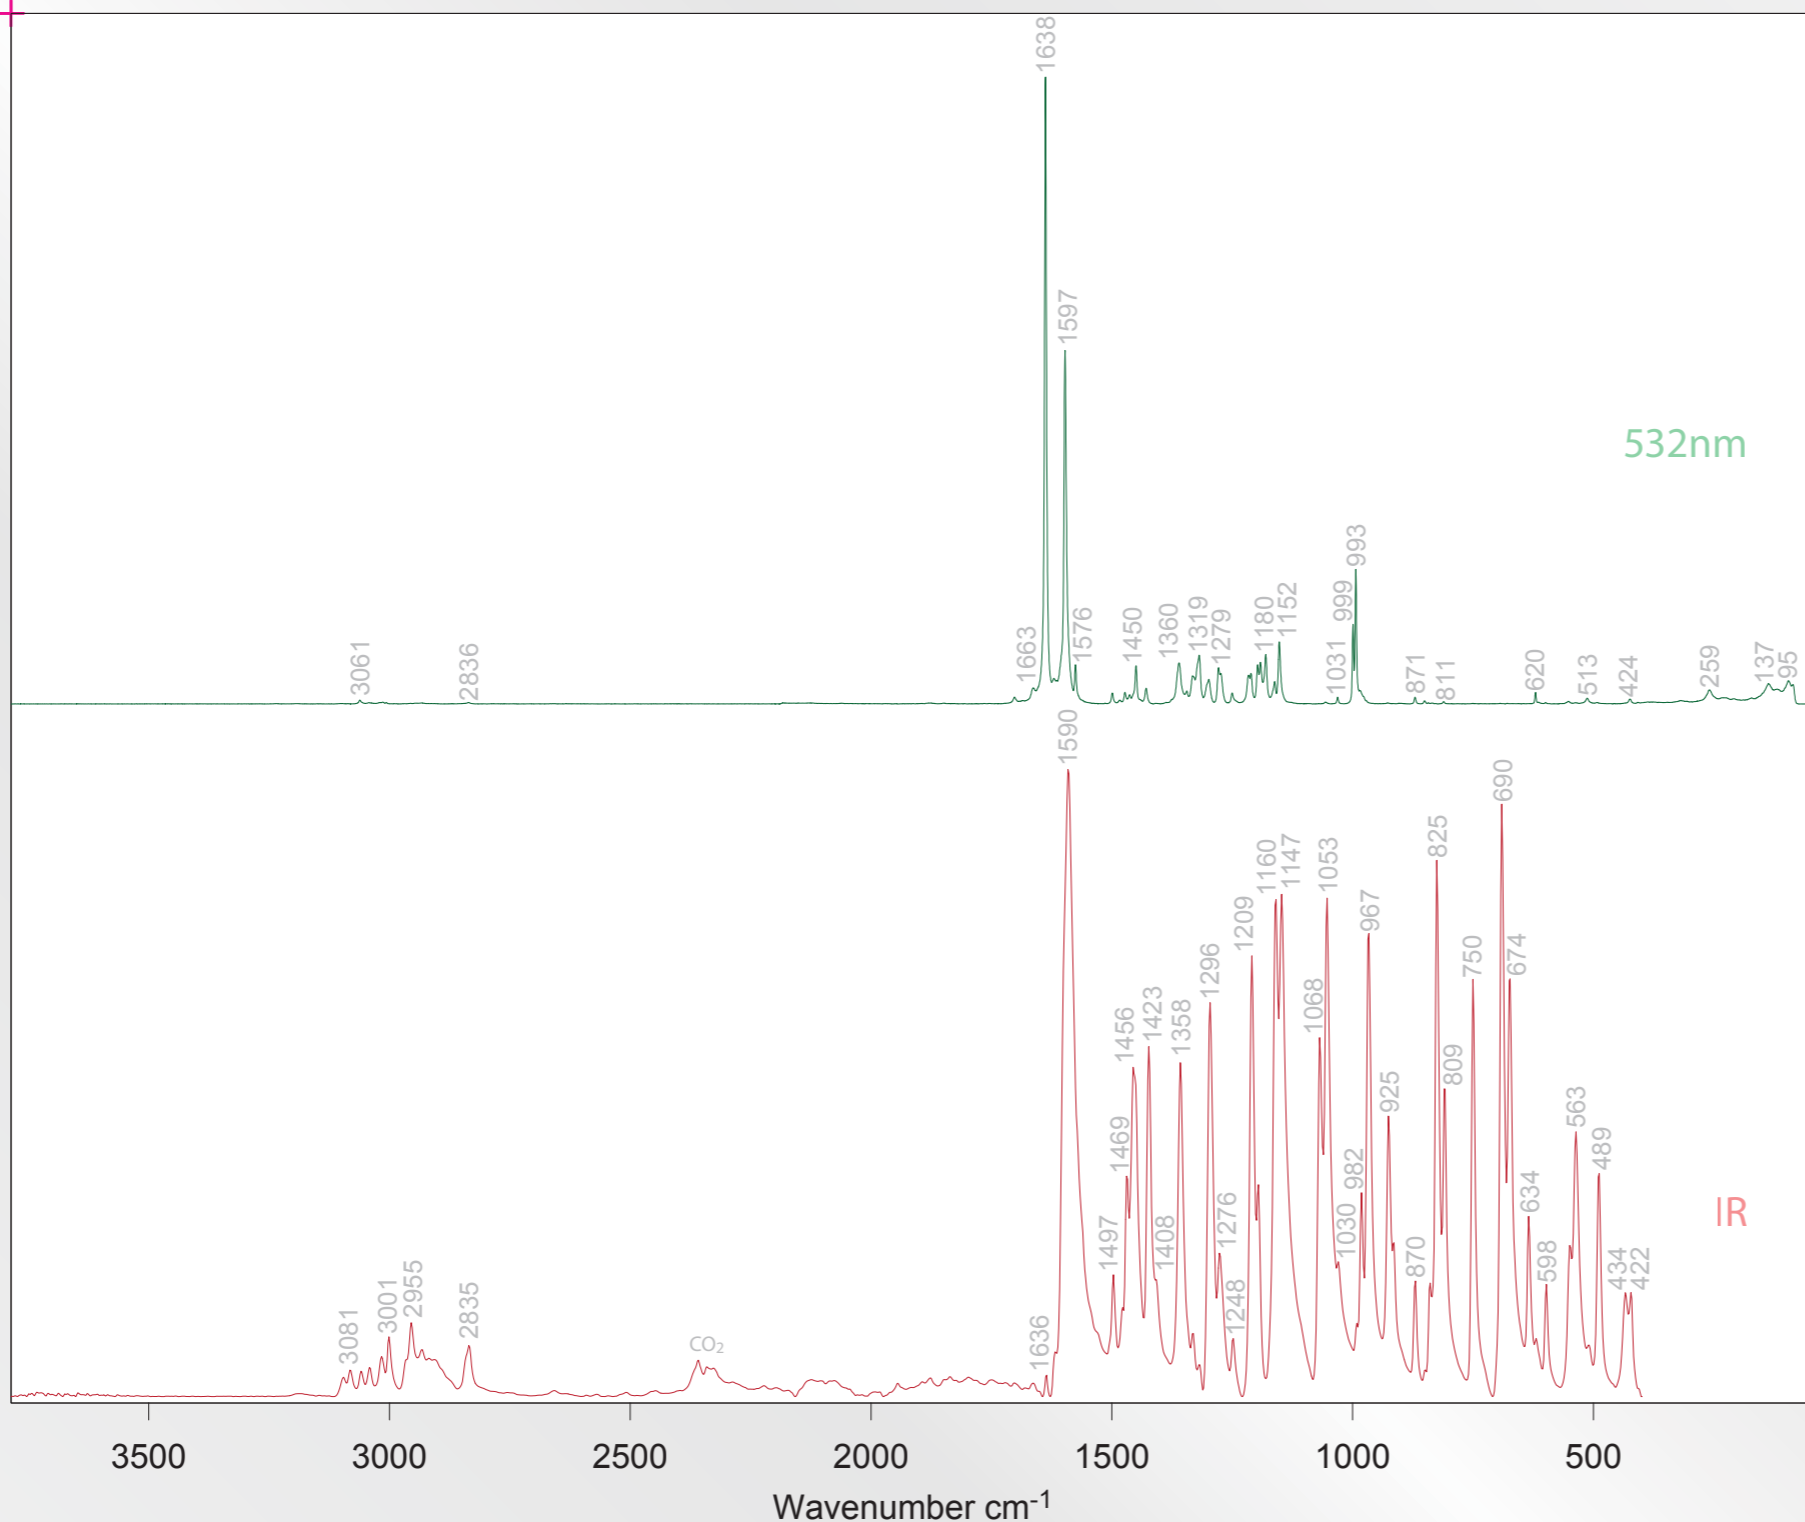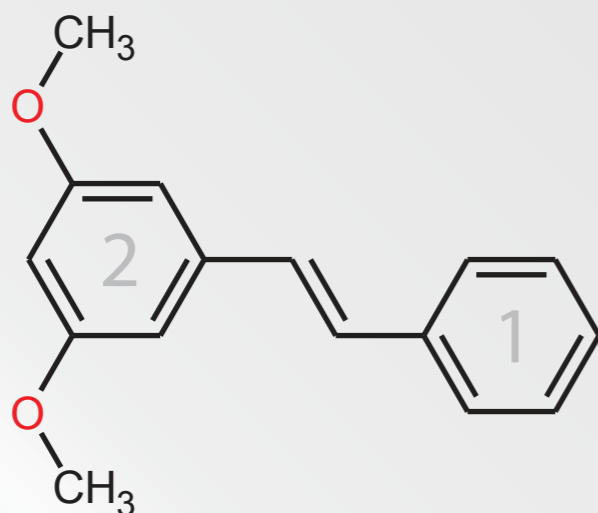

Sample: ODS011444 Mode: Vertex ATR  
 Producer: Sigma n<sub>Acc</sub>: 32  
 Purity: -  
 State: crystalline  
 Temperature: 21°C  
 measured in: neat

$\lambda_{ex}$ : 532.009 nm  
 LPO: 31 mW  
 $\nu$  (Si): 519.89 cm<sup>-1</sup>  
 $t_{int}$ : 0.13371 s  
 Grating: 1800 g/mm  
 $\rho_{Laser}$ : 0°  
 $\rho_{Spectrometer}$ : unpol  
 Objective: 20x air NA 0.4

| IR          | 532         | R1         | R2         |                                                                                                                 |
|-------------|-------------|------------|------------|-----------------------------------------------------------------------------------------------------------------|
| 3095        |             |            |            | v C-H of ring                                                                                                   |
| 3081        |             |            |            | v C-H of ring                                                                                                   |
| 3059        | 3061        |            |            | v C-H of R1                                                                                                     |
| 3041        |             |            |            | v C-H of ring                                                                                                   |
| 3016        | 3014        |            |            | v C-H of C=C                                                                                                    |
| 3001        |             |            |            | $\nu_{as}$ C-H of CH <sub>3</sub>                                                                               |
| 2955        |             |            |            | $\nu_{as}$ C-H of CH <sub>3</sub>                                                                               |
| 2932        |             |            |            | $\nu_{as}$ C-H of CH <sub>3</sub>                                                                               |
| 2918        |             |            |            | $\nu_{as}$ C-H of CH <sub>3</sub>                                                                               |
| 2835        | 2836        |            |            | $\nu_s$ C-H of CH <sub>3</sub>                                                                                  |
|             | 1702        |            |            |                                                                                                                 |
|             | 1663        |            |            |                                                                                                                 |
| 1636        | <b>1638</b> |            |            | v C=C                                                                                                           |
| 1618        | 1621        |            |            | v C=C of ring (impurity)                                                                                        |
| 1598        | <b>1597</b> | <b>8a</b>  | <b>8a</b>  | v C=C of ring                                                                                                   |
| <b>1590</b> |             |            | <b>8b</b>  | v C=C of R2                                                                                                     |
|             | 1576        | <b>8b</b>  |            | v C=C of R1                                                                                                     |
| 1497        | 1499        | <b>19a</b> |            | v C=C of ring                                                                                                   |
| 1478        | 1483        |            |            |                                                                                                                 |
| 1469        | 1473        |            | <b>19a</b> |                                                                                                                 |
|             | 1463        |            |            | $\delta_{as}$ C-H                                                                                               |
| 1456        | 1450        | <b>19b</b> |            | v C=C of R1                                                                                                     |
| 1423        | 1429        |            | <b>19b</b> | v C=C of R2                                                                                                     |
| 1408        |             |            |            |                                                                                                                 |
| 1358        | 1360        | 3          | <b>14</b>  | v C=C of R2; $\delta$ C-H of R1 and C=C                                                                         |
|             | 1344        |            |            | $\delta$ C-H                                                                                                    |
| 1332        | 1332        | <b>3</b>   |            | $\delta$ C-H of C=C; $\delta$ C-H of R1                                                                         |
| 1318        | 1322        | <b>3</b>   |            | $\delta$ C-H of C=C; $\delta$ C-H of R1                                                                         |
|             | 1319        | <b>3</b>   |            | $\delta$ C-H of C=C; $\delta$ C-H of R1                                                                         |
| 1296        | 1299        |            | <b>13</b>  | $\nu_{ip}$ [C <sub>sp</sub> -O, C <sub>sp</sub> -C], $\delta$ C=C of R2                                         |
| 1276        | 1279        | <b>14</b>  | <b>3</b>   | $\delta$ C-H of R2 and C=C                                                                                      |
|             | 1274        | <b>14</b>  | <b>3</b>   | $\delta$ C-H of R2 and C=C                                                                                      |
| 1248        | 1250        | <b>14</b>  | <b>3</b>   | $\delta$ C-H of R2 and C=C                                                                                      |
|             | 1216        | <b>13</b>  |            | v C <sub>sp</sub> -C; $\delta$ C=C of R2                                                                        |
| 1209        | 1211        | <b>13</b>  |            | v C <sub>sp</sub> -C; $\delta$ C=C of R2                                                                        |
| 1196        | 1197        |            |            | $\nu_{ip,r}$ [C-H of CH <sub>3</sub> ]                                                                          |
|             | 1192        |            |            | $\nu_{op,r}$ [C-H of CH <sub>3</sub> ]                                                                          |
|             | 1180        | <b>9a</b>  |            | $\delta$ C-H of R1                                                                                              |
| <b>1160</b> | 1162        |            | <b>7a</b>  | $\nu_{op,r}$ [C-H of CH <sub>3</sub> ]; $\delta$ C-H of R2; $\nu_{op}$ [C <sub>sp</sub> -O]; $\delta$ C=C of R2 |
| <b>1147</b> | 1152        |            | <b>7a</b>  | $\nu_{op}$ [C <sub>sp</sub> -O]; $\delta$ C=C of R2; $\nu_{op,r}$ [C-H of CH <sub>3</sub> ]; $\delta$ C-H of R2 |
|             |             |            | <b>7b</b>  | $\nu_{op}$ [C <sub>sp</sub> -O]; $\nu_{op,r}$ [C-H of CH <sub>3</sub> ]; $\delta$ C-H of R2                     |
| 1068        |             |            |            | $\nu_{op}$ [O-CH <sub>3</sub> ]                                                                                 |
| <b>1053</b> | 1057        |            |            | $\nu_{ip}$ [O-CH <sub>3</sub> ]                                                                                 |
| 1030        | 1031        | <b>18a</b> |            | $\delta$ C-H of R1                                                                                              |
|             | 999         | <b>12</b>  |            | $\delta$ C=C of R1                                                                                              |
| 991         | <b>993</b>  |            | <b>12</b>  | $\delta$ C=C of R2                                                                                              |
| 982         | 984         | <b>5</b>   |            | $\gamma$ C-H of ring                                                                                            |
| 967         |             |            |            | $\gamma_w$ C-H of C=C                                                                                           |
| 925         |             |            |            | $\nu_{ip,s}$ [C-O-C]                                                                                            |
| 915         |             |            |            | $\nu_{ip,s}$ [C-O-C]                                                                                            |
| 870         | 871         | <b>1</b>   |            | v C=C of R1                                                                                                     |
| 849         | 851         | <b>10b</b> |            | $\gamma$ C-H of R1                                                                                              |
| 839         |             |            | <b>10a</b> | $\gamma$ C-H of R2                                                                                              |
| <b>825</b>  |             | <b>11</b>  |            | $\gamma$ C-H of R2                                                                                              |
| 809         | 811         | <b>11</b>  |            | $\gamma$ C-H of R2                                                                                              |
| 750         |             | <b>11</b>  |            | $\gamma$ C-H of R1                                                                                              |
| <b>690</b>  |             | <b>4</b>   |            | $\gamma$ C=C of R1                                                                                              |
| 674         |             |            |            |                                                                                                                 |
| 634         |             |            | <b>4</b>   | $\gamma$ C=C of R2                                                                                              |
| 619         | 620         | <b>6b</b>  |            | $\delta$ C=C of R1                                                                                              |
| 598         |             |            |            |                                                                                                                 |
| 549         | 552         | <b>6a</b>  | <b>6a</b>  | $\delta_{ip}$ [C=C of ring]                                                                                     |
| 536         |             | <b>6a</b>  | <b>6a</b>  | $\delta_{op}$ [C=C of ring]                                                                                     |
| 510         | 513         |            | <b>6b</b>  | $\delta$ C=C of R2                                                                                              |
| 489         |             |            | <b>16b</b> | $\gamma$ C=C of R1                                                                                              |
| 434         |             |            |            |                                                                                                                 |
| 422         | 424         |            |            |                                                                                                                 |
| 406         |             |            |            |                                                                                                                 |
|             | 319         |            |            |                                                                                                                 |
|             | 259         |            |            |                                                                                                                 |
|             | 137         |            |            |                                                                                                                 |
|             | 95          |            |            |                                                                                                                 |
|             | 86          |            |            |                                                                                                                 |

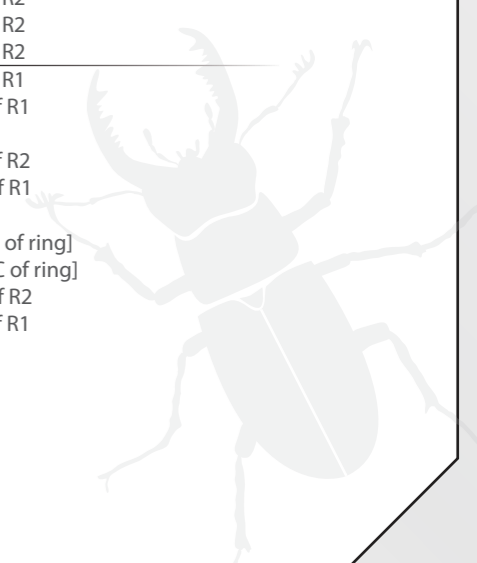

Raman intensity / Absorbance

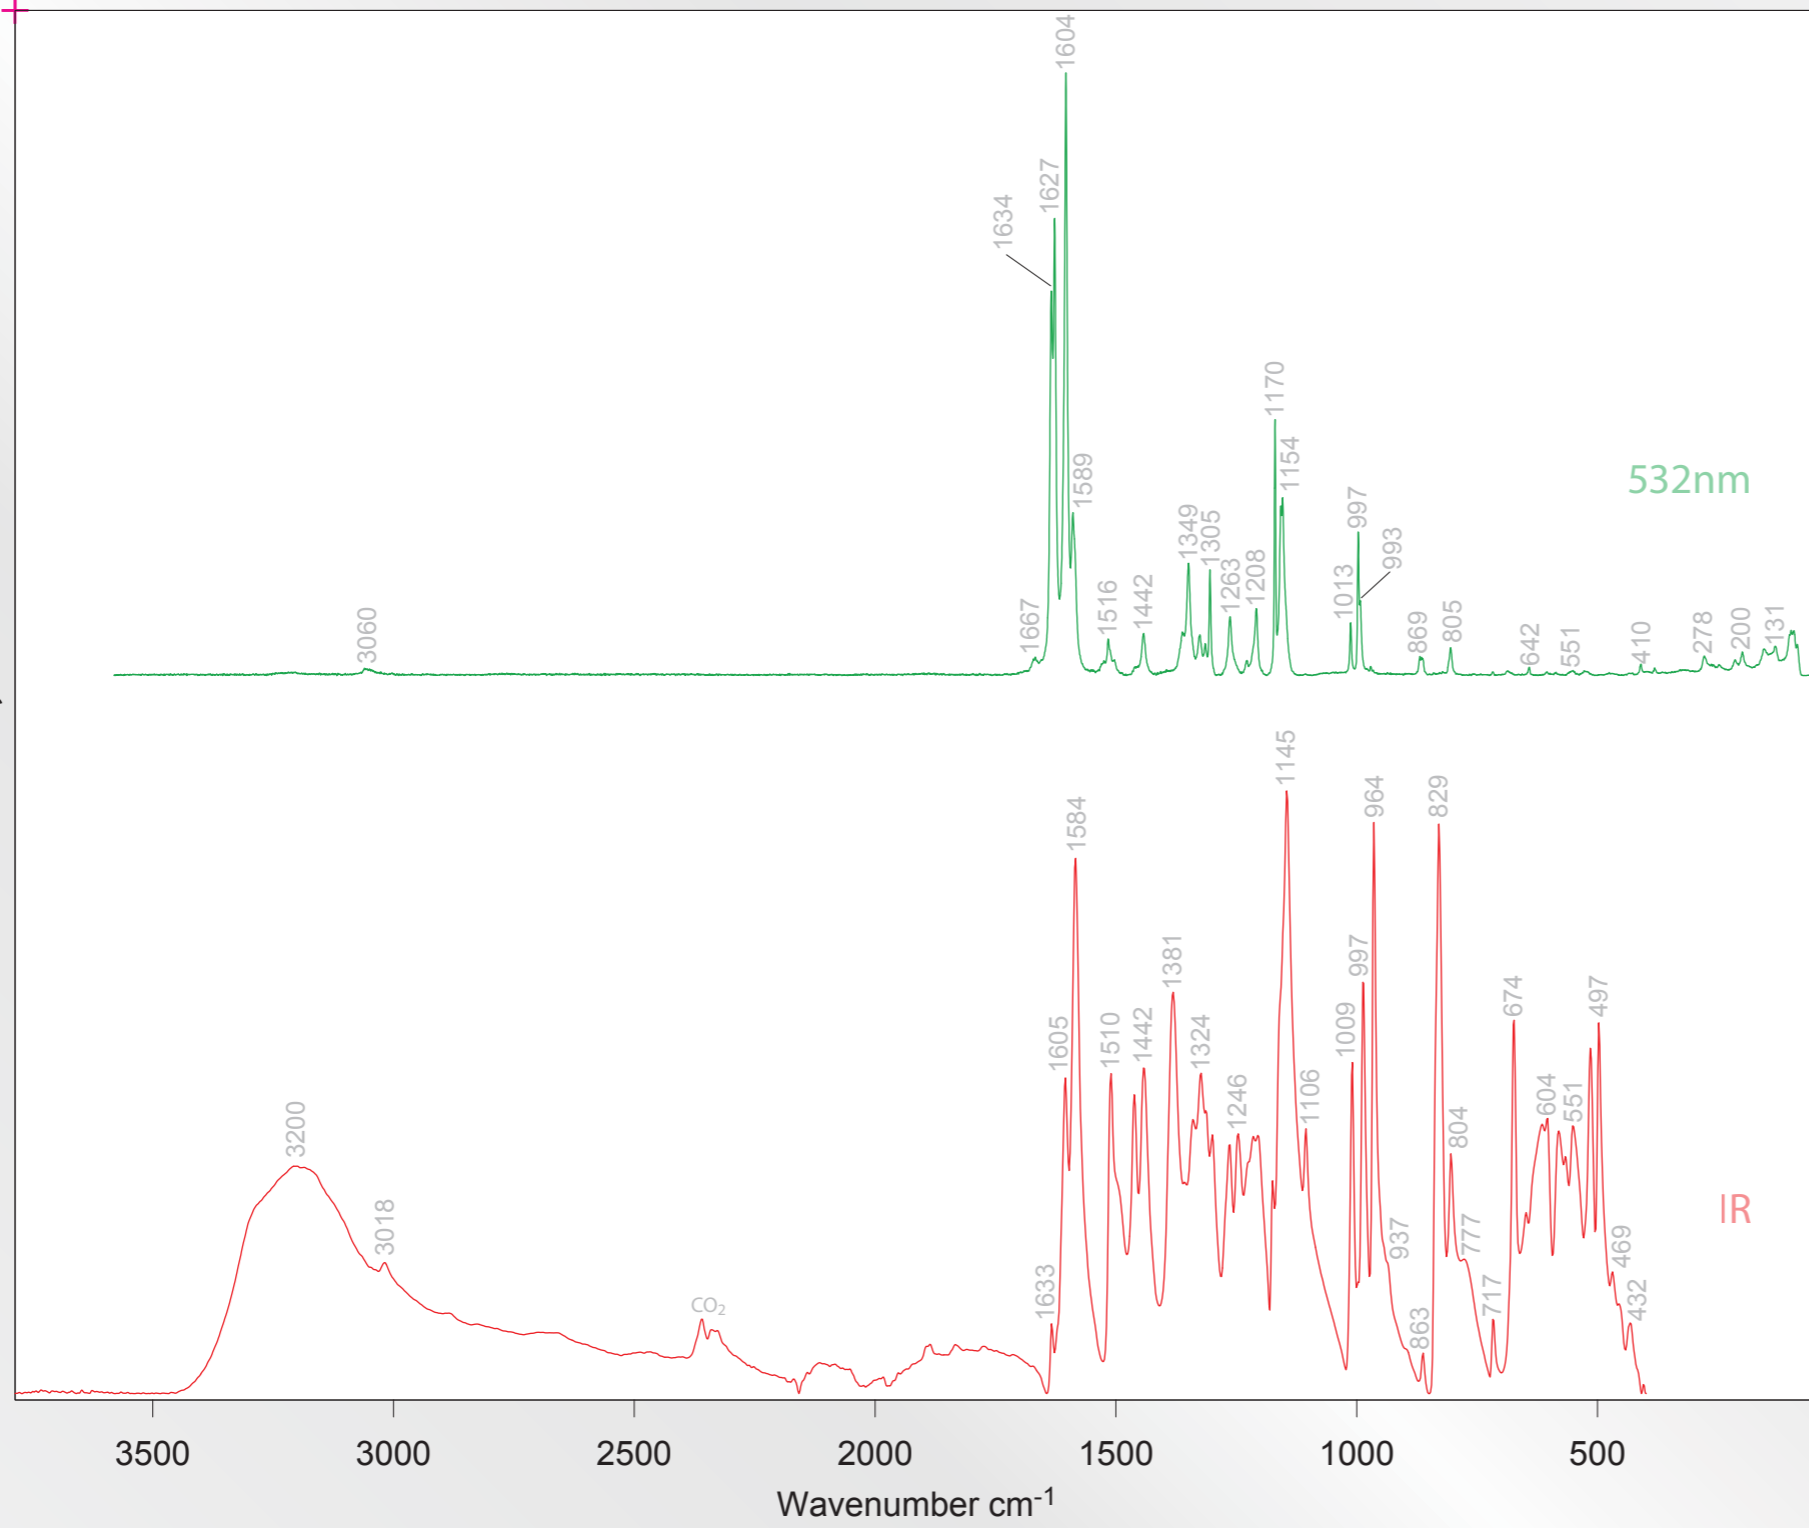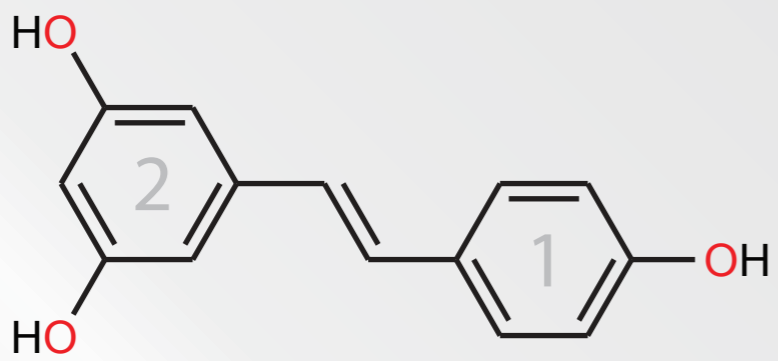

|                             |                         |                    |            |
|-----------------------------|-------------------------|--------------------|------------|
| Sample:                     | ODS011444               | Mode:              | Vertex ATR |
| Producer:                   | Sigma                   | n <sub>Acc</sub> : | 32         |
| Purity:                     | -                       |                    |            |
| State:                      | crystalline             |                    |            |
| Temperature:                | 21°C                    |                    |            |
| measured in:                | neat                    |                    |            |
| <hr/>                       |                         |                    |            |
| λ <sub>ex</sub> :           | 532.009 nm              |                    |            |
| LPO:                        | 31 mW                   |                    |            |
| v (Si):                     | 519.89 cm <sup>-1</sup> |                    |            |
| t <sub>int</sub> :          | 0.13371 s               |                    |            |
| Grating:                    | 1800 g/mm               |                    |            |
| p <sub>Laser</sub> :        | 0°                      |                    |            |
| p <sub>Spectrometer</sub> : | unpol                   |                    |            |
| Objective:                  | 20x air NA 0.4          |                    |            |

| IR          | 532         |
|-------------|-------------|
| 3200        | 3218        |
|             | 3060        |
| 3018        | 1667        |
| 1633        | <b>1634</b> |
|             | <b>1627</b> |
| 1605        | <b>1604</b> |
| <b>1584</b> | 1589        |
| 1510        | 1516        |
| 1495        | 1502        |
| 1462        | 1460        |
| 1444        | 1442        |
| 1381        |             |
| 1357        | 1362        |
|             | 1349        |
| 1340        |             |
| 1324        | 1325        |
| 1313        | 1315        |
| 1300        | 1305        |
| 1264        | 1263        |
| 1246        |             |
|             | 1228        |
| 1215        |             |
| 1205        | 1208        |
| 1174        | <b>1170</b> |
| 1157        | <b>1158</b> |
|             | <b>1154</b> |
| <b>1145</b> |             |
| 1106        |             |
| 1009        | 1013        |
| 997         | <b>997</b>  |
|             | 993         |
| 987         |             |
| <b>964</b>  | 971         |
| 937         |             |
| 896         |             |
|             | 869         |
| 863         | 865         |
| <b>829</b>  |             |
| 804         | 805         |
| 777         |             |
| 717         | 717         |
|             | 687         |
| 674         |             |
| 648         | 642         |
| 615         |             |
| 604         | 605         |
| 581         |             |
| 567         |             |
| 551         | 551         |
|             | 528         |
| 515         |             |
| 497         |             |
|             | 476         |
| 469         |             |
| 456         |             |
| 432         |             |
|             | 410         |
| 404         |             |
|             | 381         |
|             | 278         |
|             | 248         |
|             | 214         |
|             | 200         |
|             | 154         |
|             | 131         |
|             | 98          |
|             | 92          |
|             | 85          |

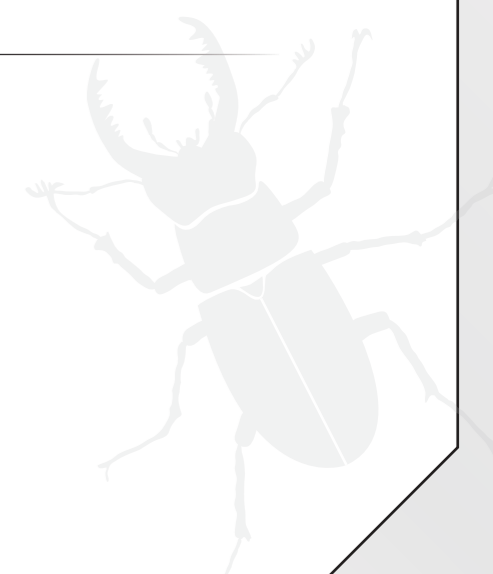

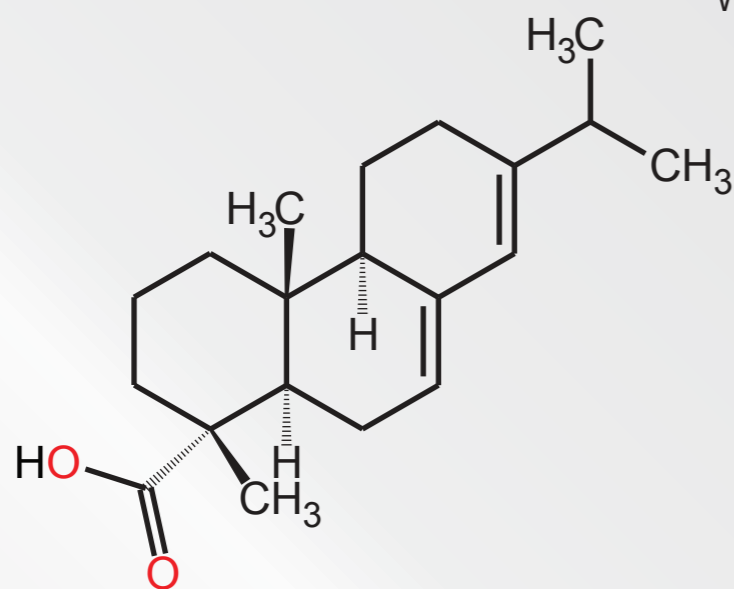

Raman intensity / Absorbance

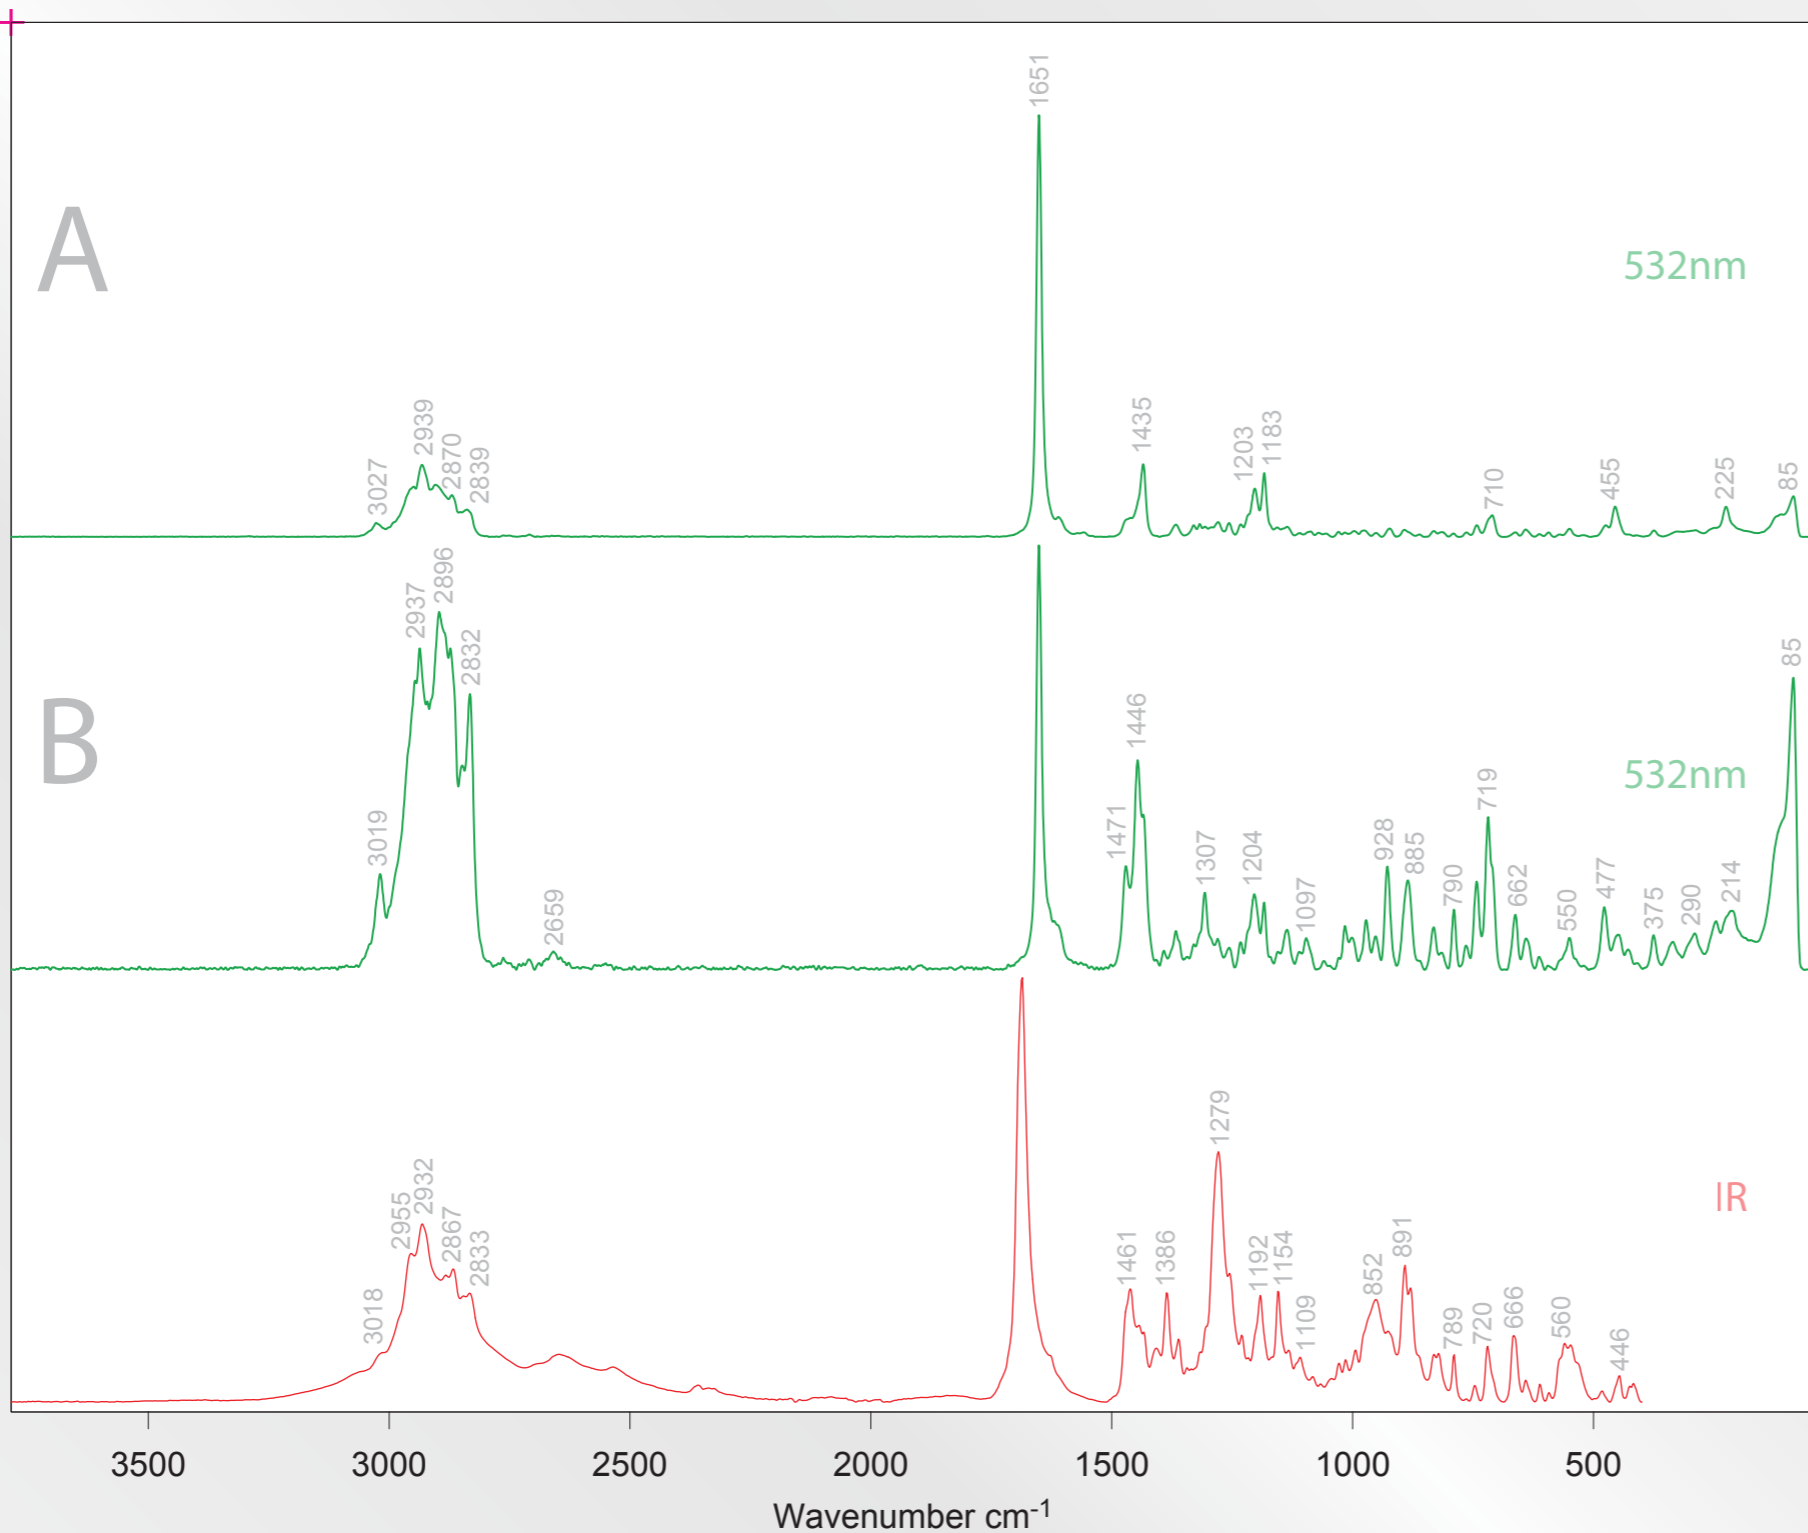

Sample: 00010  
Producer: Sigma  
Purity: 75%  
State: crystalline  
Temperature: 23°C  
measured in: neat

Mode: Vertex ATR  
n<sub>Acc</sub>: 32

λ<sub>ex</sub>: 532.001 nm  
LPO: 30.1 mW  
ν (Si): 520.59 cm<sup>-1</sup>  
t<sub>int</sub>: 0.04371 s  
Grating: 600 g/mm  
ρ<sub>Laser</sub>: 0/90°  
ρ<sub>Spectrometer</sub>: unpol  
Objective: 20x air NA 0.4

| IR          | 532 A       | 532 B       |
|-------------|-------------|-------------|
| 3018        | 3027        | 3019        |
| 2955        | 2949        | <b>2946</b> |
| <b>2932</b> | 2932        | <b>2937</b> |
|             |             | <b>2921</b> |
|             | 2904        | <b>2896</b> |
| 2883        |             |             |
| 2867        | 2870        | <b>2873</b> |
|             | 2853        | <b>2848</b> |
| 2833        | 2839        | <b>2832</b> |
|             | 2763        | 2763        |
|             | 2752        |             |
|             | 2709        | 2710        |
| 2648        |             | 2659        |
| 2536        |             | 2565        |
| <b>1686</b> | <b>1651</b> | <b>1651</b> |
|             | 1611        | 1619        |
|             | 1571        | 1575        |
|             | 1558        | 1564        |
|             |             | 1502        |
|             |             | 1471        |
| 1461        | 1461        | <b>1446</b> |
| 1444        |             |             |
| 1434        | 1435        | 1434        |
| 1408        |             |             |
| 1386        |             | 1392        |
| 1361        | 1367        | 1367        |
| 1344        |             | 1343        |
| 1371        |             |             |
|             | 1330        | 1330        |
|             | 1317        |             |
| 1305        | 1306        | 1307        |
|             | 1293        |             |
| <b>1279</b> | 1279        | 1280        |
| 1255        | 1256        | 1256        |
| 1230        | 1232        | 1233        |
| 1192        | 1203        | 1204        |
|             | 1183        | 1184        |
| 1154        | 1157        | 1155        |
| 1133        | 1136        | 1136        |
| 1109        | 1111        | 1111        |
| 1083        | 1087        | 1096        |
| 1066        | 1071        |             |
| 1058        | 1056        | 1060        |
|             | 1029        | 1029        |
| 1014        | 1016        | 1016        |
| 994         | 997         | 1001        |
|             | 975         | 972         |
| 952         | 951         | 952         |
| 927         | 923         | 928         |
| <b>891</b>  | 893         | 885         |
| 880         |             |             |
| 862         | 861         |             |
| 831         | 831         | 832         |
| 822         | 814         | 816         |
| 789         | 790         | 790         |
|             | 764         | 764         |
| 746         | 742         | 742         |
| 720         |             | <b>719</b>  |
|             | 710         |             |
| 666         | 662         | 662         |
| 640         | 641         | 640         |
| 611         | 612         | 613         |
| 592         | 593         |             |
| 570         | 570         |             |
| 560         |             |             |
| 547         | 550         | 550         |
|             | 522         |             |
| 482         |             | 478         |
|             | 474         |             |
|             | 455         |             |
| 446         |             | 448         |
|             | 428         | 428         |
| 417         | 411         |             |
|             | 375         | 375         |
|             | 327         | 335         |
|             | 304         |             |
|             | 288         | 289         |
|             | 249         | 246         |
|             | 225         |             |
|             |             | 213         |
|             | 111         | 112         |
|             | 85          | 85          |

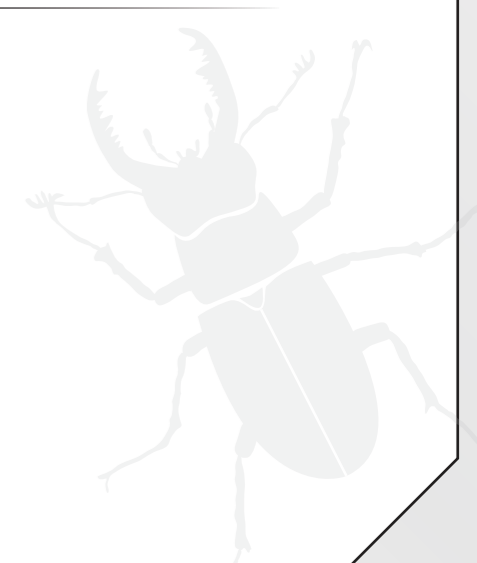

# Oleic acid

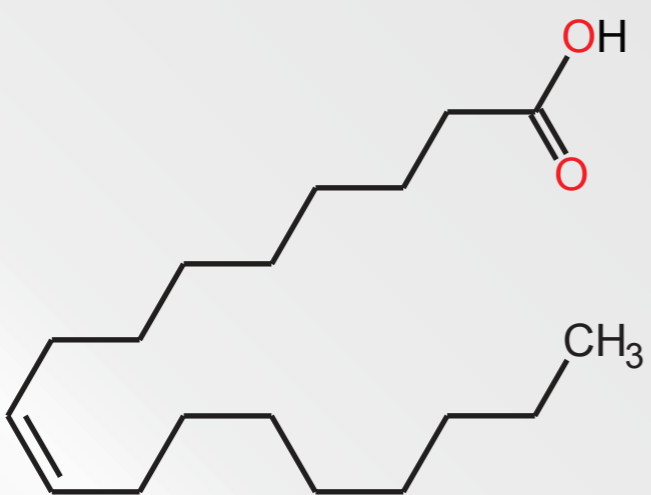

Raman intensity / Absorbance

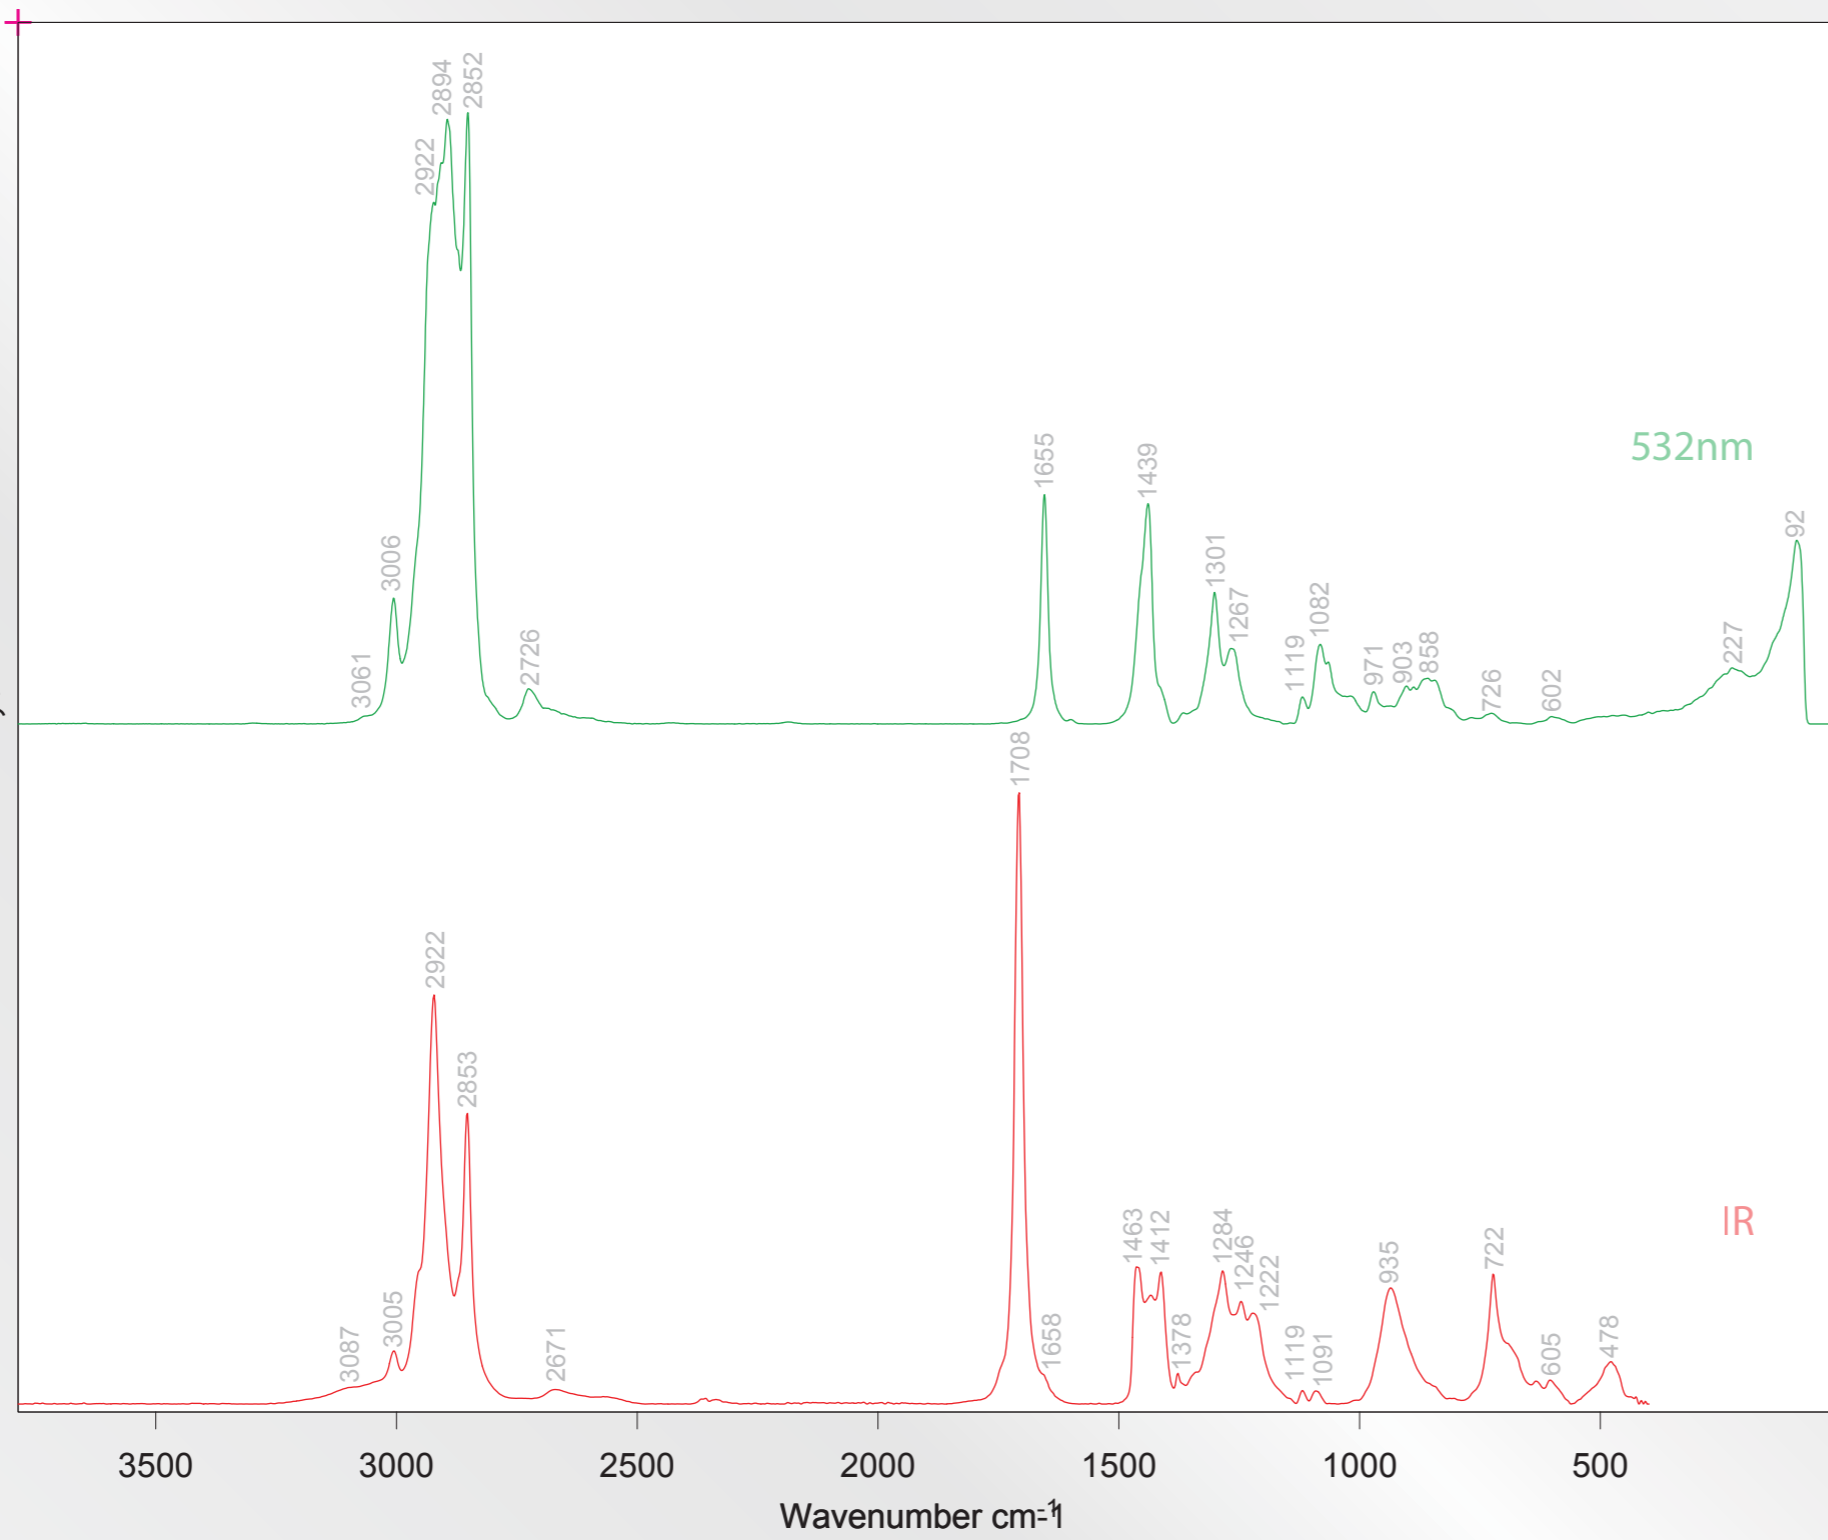

|                             |                |                    |            |
|-----------------------------|----------------|--------------------|------------|
| Sample:                     | -              | Mode:              | Vertex ATR |
| Producer:                   | Sigma          | n <sub>Acc</sub> : | 32         |
| Purity:                     | -              |                    |            |
| State:                      | liquid         |                    |            |
| Temperature:                | 21°C           |                    |            |
| measured in:                | neat           |                    |            |
| <hr/>                       |                |                    |            |
| λ <sub>ex</sub> :           | 532.001 nm     |                    |            |
| LPO:                        | 39.6 mW        |                    |            |
| v (Si):                     | -              |                    |            |
| t <sub>int</sub> :          | 5.09756 s      |                    |            |
| Grating:                    | 600 g/mm       |                    |            |
| p <sub>Laser</sub> :        | 0°             |                    |            |
| p <sub>Spectrometer</sub> : | unpol          |                    |            |
| Objective:                  | 20x air NA 0.4 |                    |            |

|             |             |                                                    |
|-------------|-------------|----------------------------------------------------|
| IR          | 532         |                                                    |
| 3087        |             |                                                    |
| 3005        | 3006        | v C-H of C=C                                       |
| 2954        |             | v <sub>as</sub> C-H of CH <sub>3</sub>             |
| <b>2922</b> | <b>2922</b> | v <sub>as</sub> C-H of CH <sub>2</sub>             |
|             | <b>2894</b> | v <sub>as</sub> C-H of CH <sub>2</sub>             |
| 2853        | <b>2852</b> | v <sub>s</sub> C-H of CH <sub>2</sub>              |
|             | 2726        | 2δ <sub>as</sub> C-H of CH <sub>2</sub> (overtone) |
| 2671        |             |                                                    |
| <b>1708</b> |             | v C=O                                              |
| 1658        | 1655        | v C=C                                              |
| 1463        |             | δ <sub>s</sub> C-H of CH <sub>2</sub>              |
| 1434        | 1439        | δ <sub>s</sub> C-H of CH <sub>2</sub>              |
| 1412        |             | δ <sub>s</sub> C-H of CH <sub>2</sub>              |
| 1378        |             | δ <sub>s</sub> C-H of CH <sub>3</sub>              |
| 1339        |             | δ C-H                                              |
|             | 1301        | γ <sub>t</sub> C-H of CH <sub>2</sub>              |
| 1284        |             | γ <sub>w/t</sub> C-H of CH <sub>2</sub>            |
|             | 1267        | γ <sub>w/t</sub> C-H of CH <sub>2</sub>            |
| 1246        |             | γ <sub>w/t</sub> C-H of CH <sub>2</sub>            |
| 1222        |             | γ <sub>w/t/r</sub> C-H of CH <sub>2</sub>          |
| 1119        | 1119        | γ <sub>w/t/r</sub> C-H of CH <sub>2</sub>          |
| 1091        |             | γ <sub>w/t/r</sub> C-H of CH <sub>2</sub>          |
|             | 1082        |                                                    |
|             | 1065        |                                                    |
|             | 1016        |                                                    |
|             | 971         | γ <sub>w</sub> C-H of C=C                          |
| 935         |             |                                                    |
|             | 903         |                                                    |
|             | 888         |                                                    |
|             | 858         |                                                    |
|             | 843         |                                                    |
|             | 810         |                                                    |
|             | 767         |                                                    |
| 722         |             | γ <sub>r</sub> C-H of CH <sub>2</sub>              |
| 634         | 629         |                                                    |
| 605         | 602         |                                                    |
| 478         |             |                                                    |
|             | 227         |                                                    |
|             | 92          |                                                    |

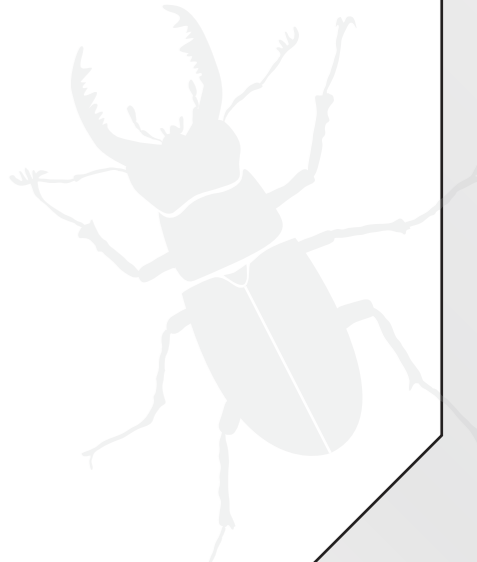

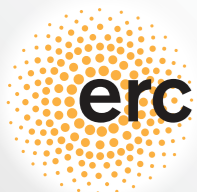

European Research Council  
Established by the European Commission

SCATAPNUT  
[681885]

# Linoleic acid

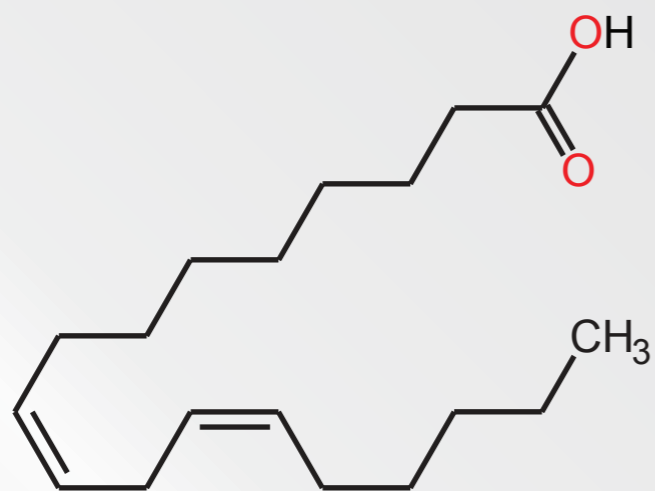

Raman intensity / Absorbance

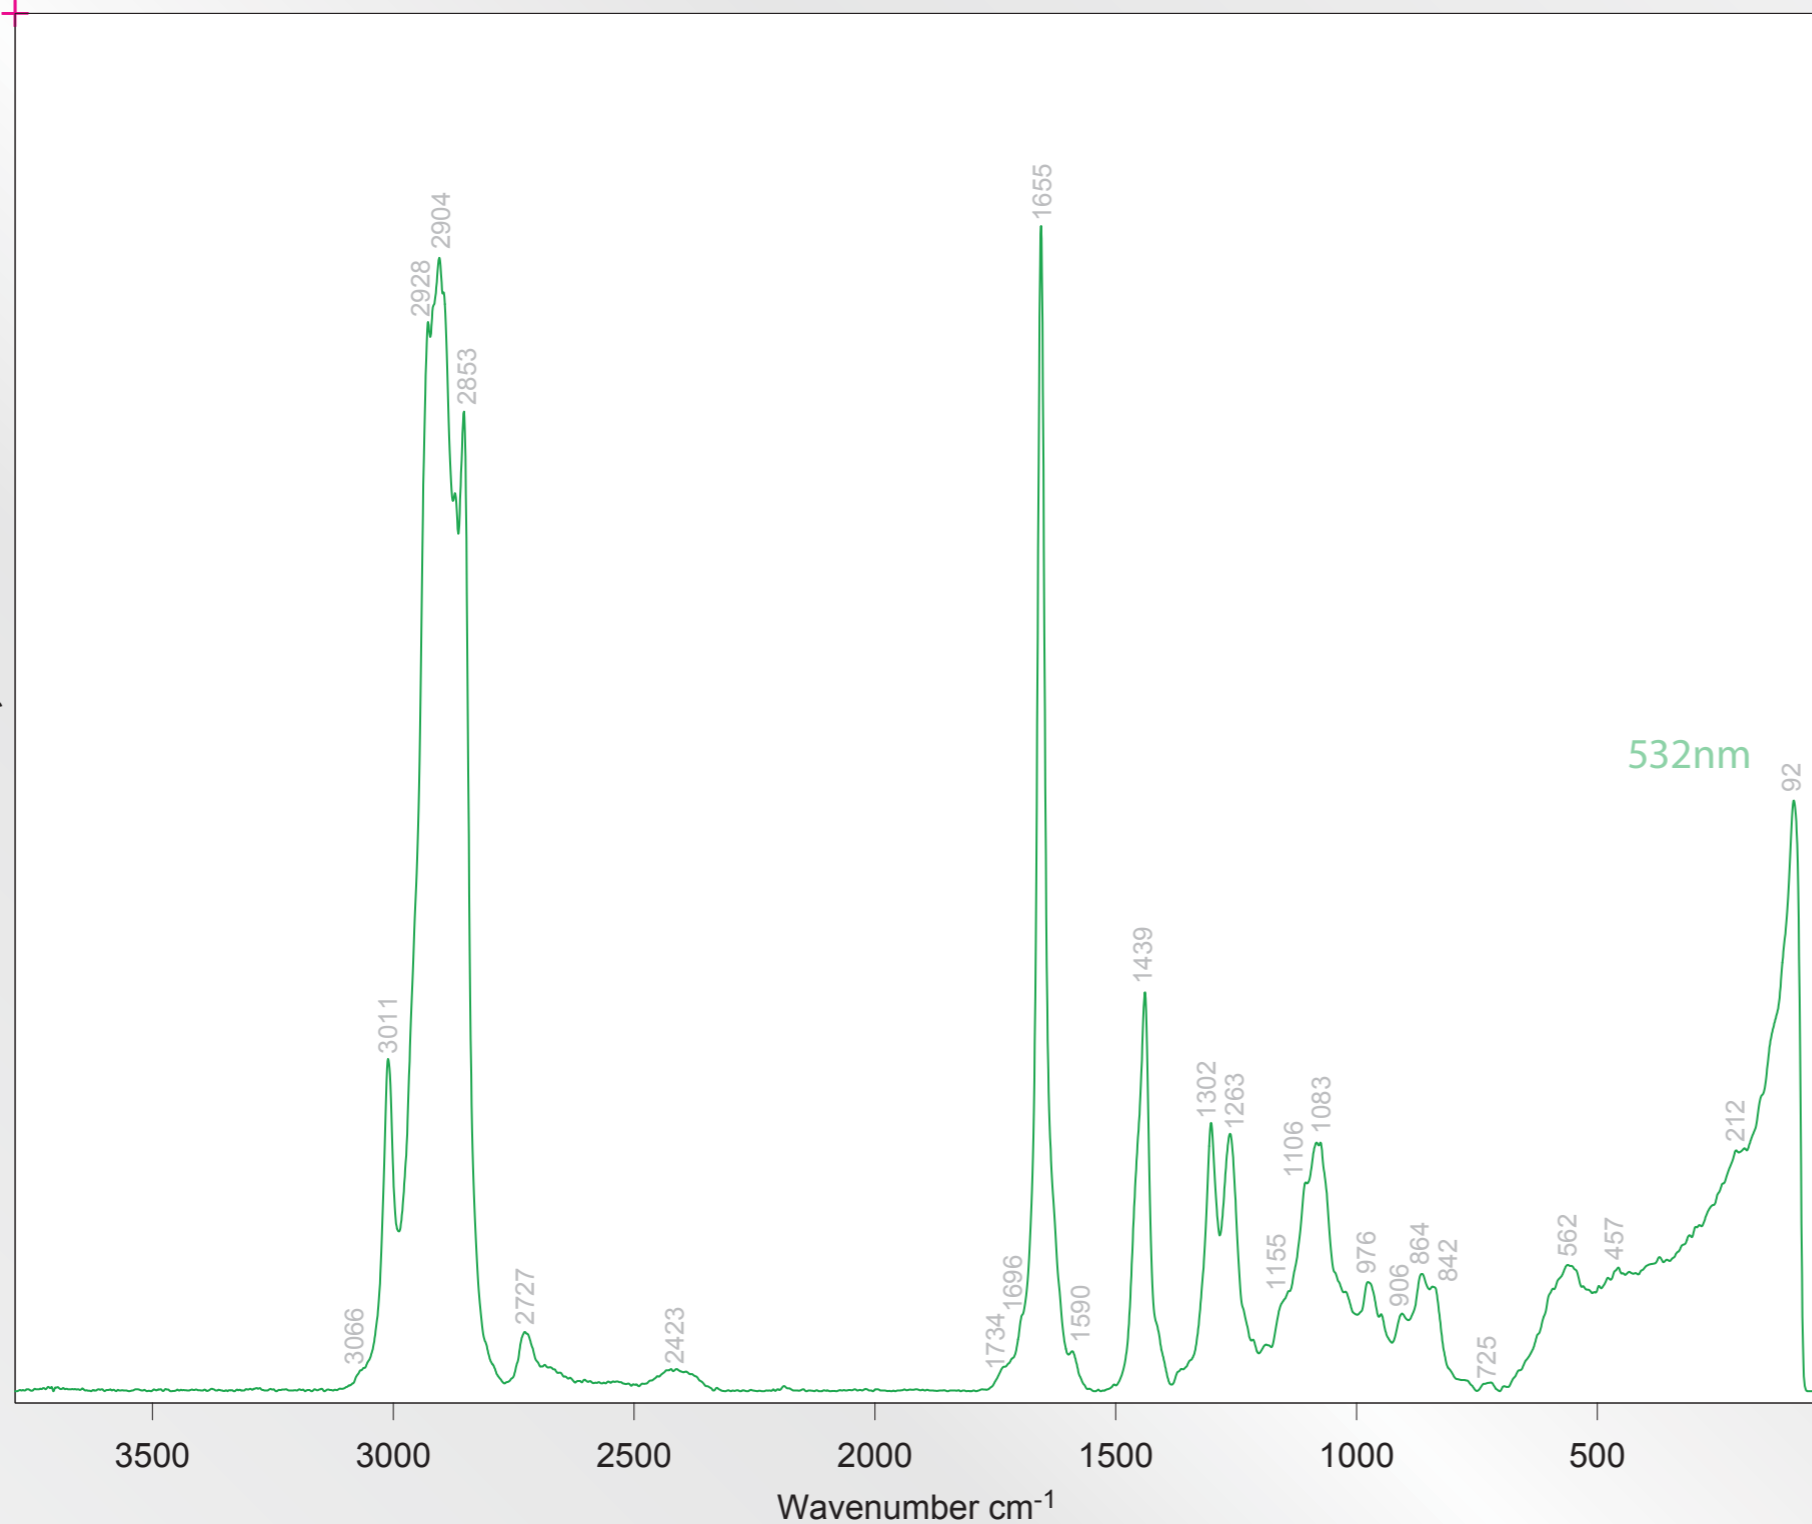

Sample: L1376  
Producer: Sigma  
Purity: 99%  
State: liquid  
Temperature: 21°C  
measured in: neat

Mode: Vertex ATR  
n<sub>Acc</sub>: 32

λ<sub>ex</sub>: 532.001 nm  
LPO: 39.6 mW  
v (Si): -  
t<sub>int</sub>: 5.09726 s  
Grating: 600 g/mm  
p<sub>Laser</sub>: 0°  
p<sub>Spectrometer</sub>: unpol  
Objective: 20x air NA 0.4

- 532
- 3066
- 3011
- 2928**
- 2904**
- 2896**
- 2872**
- 2853**
- 2727
- 2423
- 1734
- 1696
- 1655**
- 1590
- 1439
- 1364
- 1302
- 1263
- 1215
- 1188
- 1155
- 1106
- 1083
- 1075
- 1023
- 976
- 949
- 906
- 864
- 842
- 776
- 725
- 562
- 457
- 212
- 92

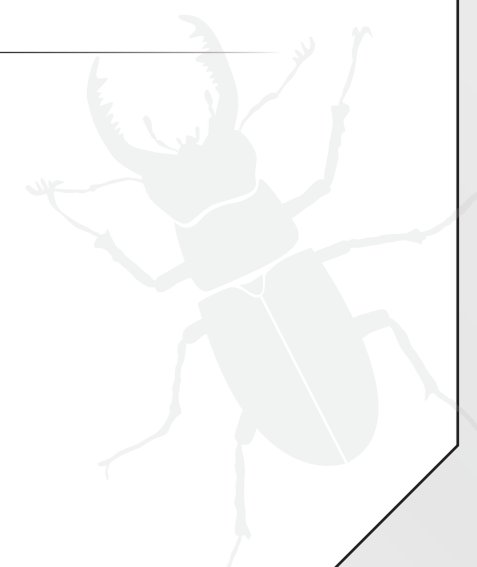

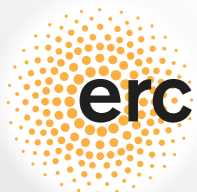

European Research Council  
Established by the European Commission

SCATAPNUT  
[681885]

# Glycerol trilineolate

Raman intensity / Absorbance

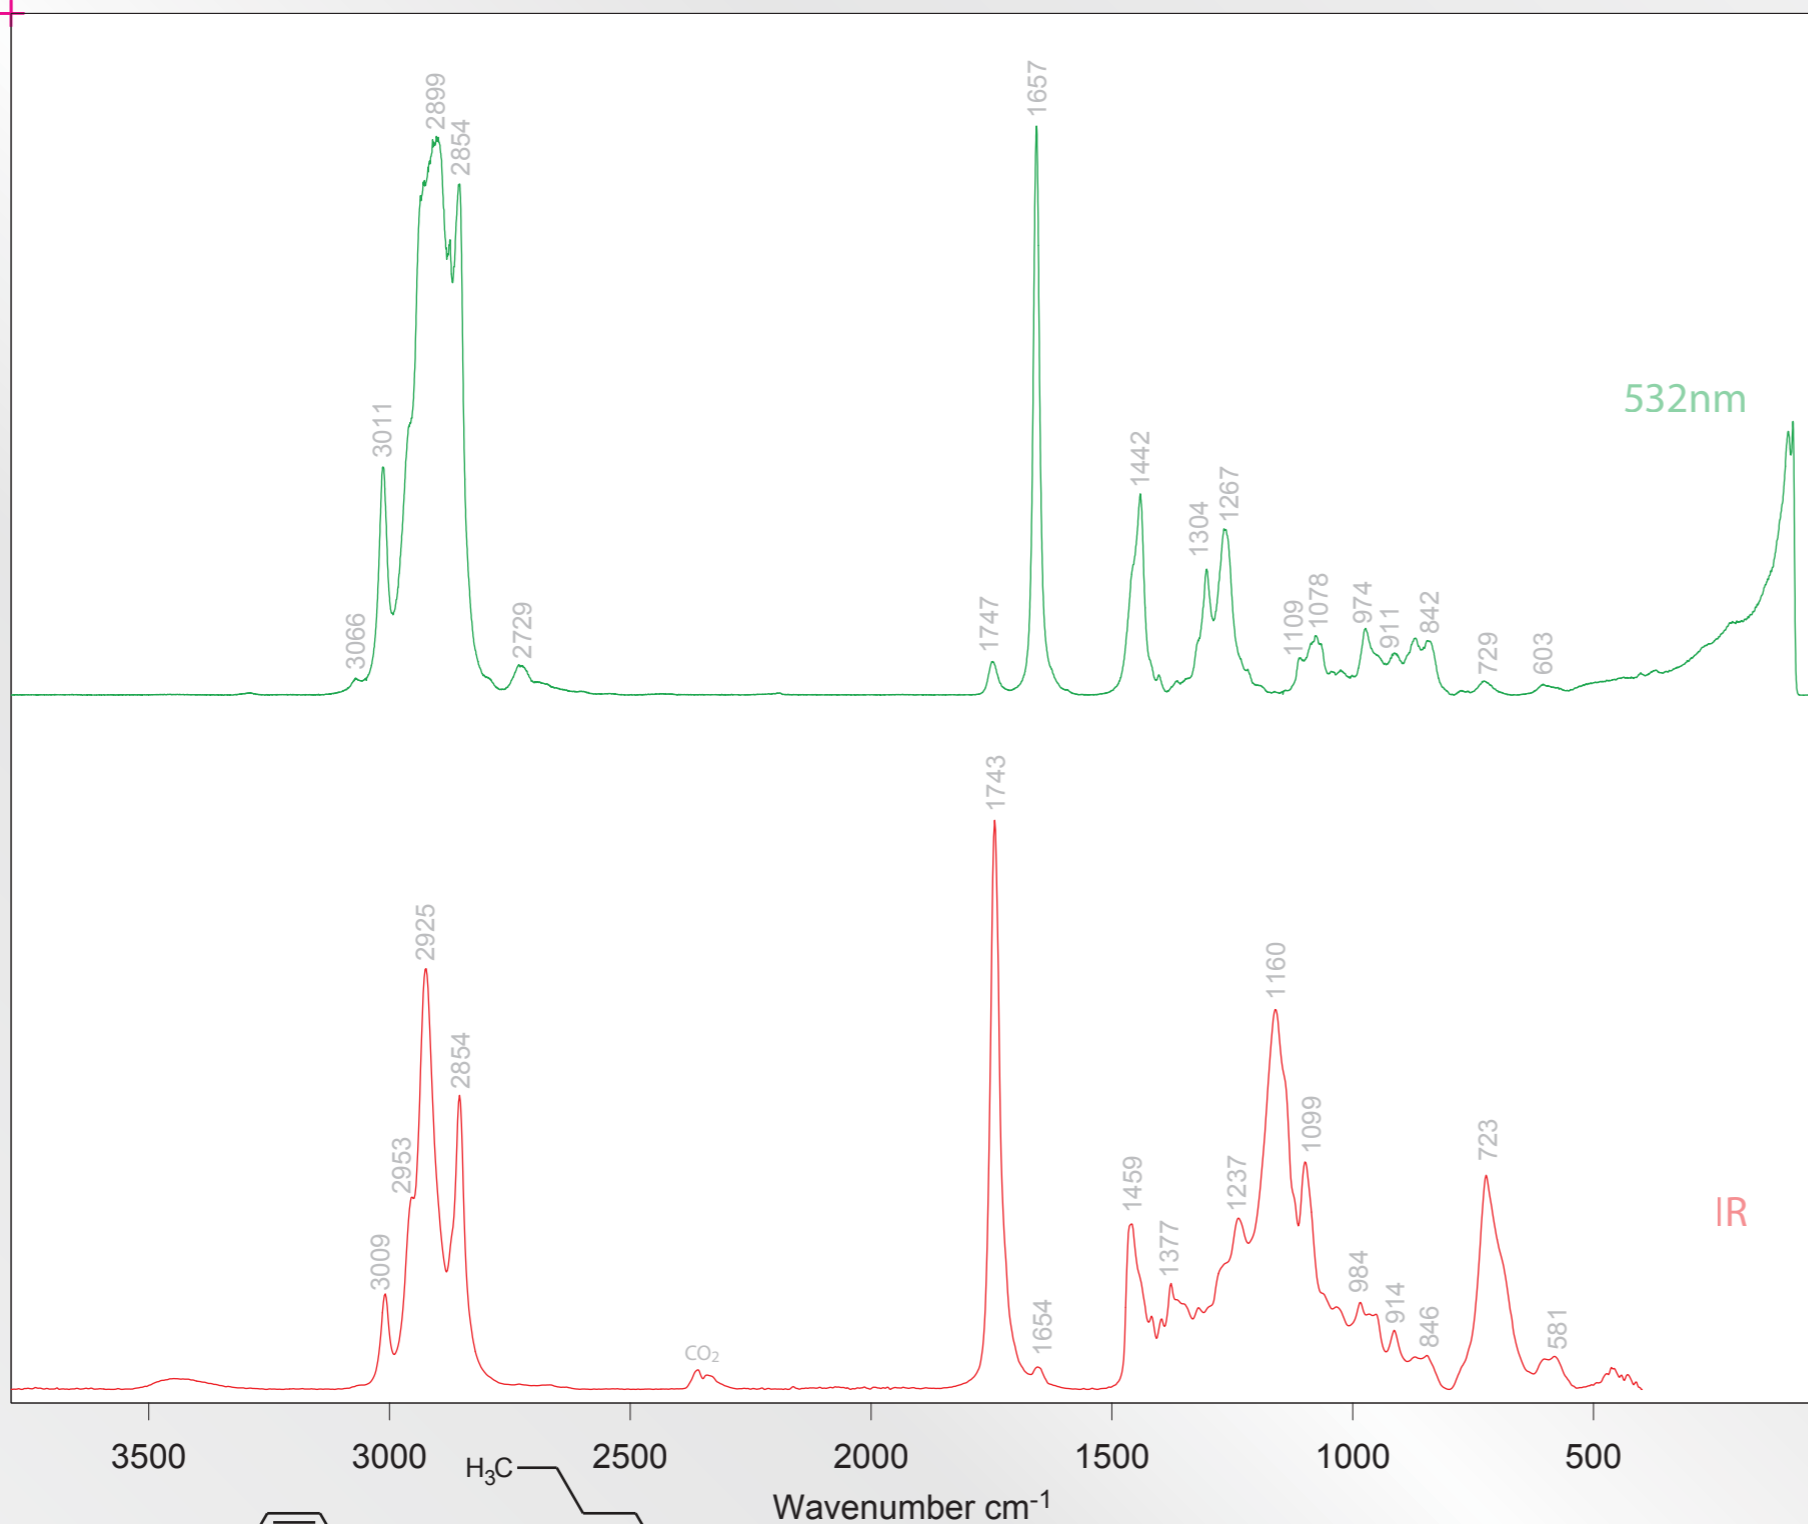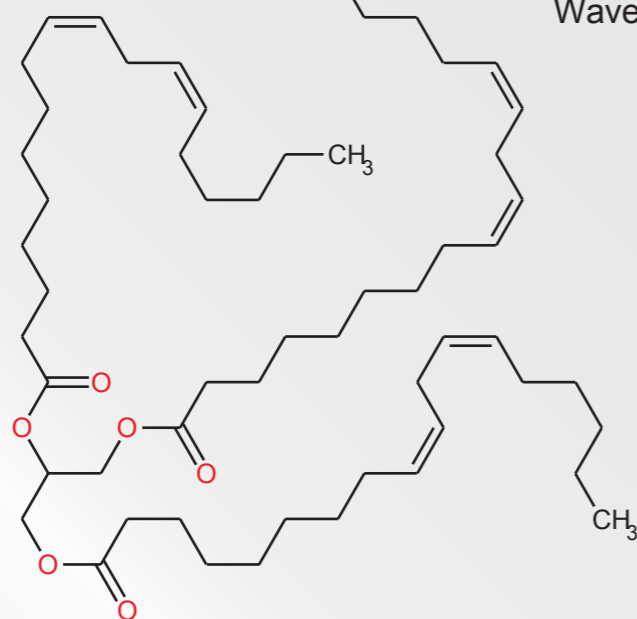

Sample: T9517  
 Producer: Sigma  
 Purity: 98%  
 State: liquid  
 Temperature: 21°C  
 measured in: neat

Mode: Vertex ATR  
 n<sub>Acc</sub>: 32

λ<sub>ex</sub>: 532.001 nm  
 LPO: 33.3 mW  
 v (Si): 520.67 cm<sup>-1</sup>  
 t<sub>int</sub>: 3.09756 s  
 Grating: 1800 g/mm  
 P<sub>Laser</sub>: 0°  
 P<sub>Spectrometer</sub>: unpol  
 Objective: 20x air NA 0.4

|             |             |
|-------------|-------------|
| IR          | 532         |
| 3443        |             |
| 3057        | 3070        |
| 3009        | 3014        |
| <b>2953</b> | <b>2957</b> |
| <b>2925</b> | <b>2935</b> |
|             | <b>2925</b> |
|             | <b>2910</b> |
|             | 2899        |
|             | 2874        |
| <b>2854</b> | 2854        |
|             | 2732        |
| <b>1743</b> | 1747        |
| 1654        | <b>1656</b> |
| 1459        | 1455        |
|             | 1441        |
| 1418        | 1421        |
| 1397        | 1403        |
| 1377        |             |
| 1366        | 1364        |
| 1350        |             |
| 1320        | 1324        |
|             | 1303        |
| 1275        |             |
| 1261        | 1267        |
| 1237        |             |
| <b>1160</b> | 1218        |
| 1143        |             |
| 1122        |             |
|             | 1109        |
| 1099        |             |
|             | 1076        |
| 1061        | 1062        |
|             | 1045        |
| 1034        |             |
|             | 1025        |
|             | 1001        |
| 984         |             |
| 966         | 973         |
| 952         |             |
| 914         | 914         |
| 871         | 870         |
| 846         | 846         |
| <b>723</b>  | 727         |
| 689         |             |
| 602         | 605         |
| 581         |             |
| 473         |             |
| 463         |             |
| 442         |             |
| 429         |             |
| 412         |             |
|             | 211         |
|             | 96          |
|             | 86          |

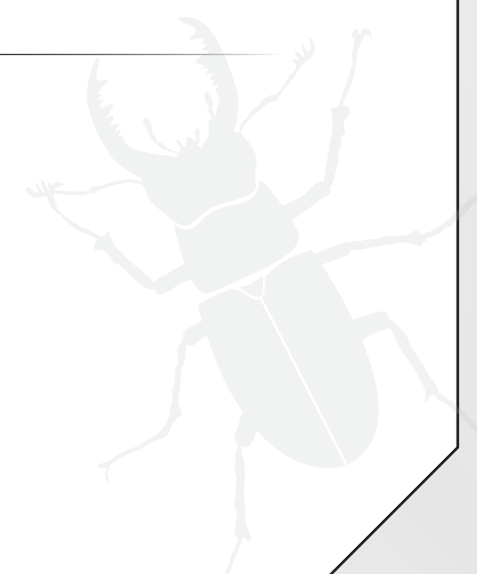

Supplement: tpy073_reference_spectra.pdf [file tpy073_reference_spectra.pdf]
